# A mathematical model of *Campylobacter* dynamics within a broiler flock

Thomas Rawson<sup>1\*</sup>, Marian Stamp Dawkins<sup>2</sup>, Michael B. Bonsall<sup>1</sup>

**1** Mathematical Ecology Research Group, Department of Zoology, University of Oxford, Oxford, OX1 3PS, U.K.

**2** Department of Zoology, University of Oxford, John Krebs Field Station, Wytham, Oxford, OX2 8QJ, U.K.

\* [thomas.rawson@zoo.ox.ac.uk](mailto:thomas.rawson@zoo.ox.ac.uk)

## Abstract

Globally, the bacterial genus *Campylobacter* is one of the leading causes of human gastroenteritis, with its primary route of infection being through poultry meat. Despite decades of study we appear to be no closer to preventing outbreaks within commercial chicken flocks, and the application of biosecurity measures is limited by a lack of understanding of the transmission dynamics within a flock. Our work is the first to undertake a mathematical modelling approach to *Campylobacter* population dynamics within a flock of broilers (chickens bred specifically for meat). A system of stochastic differential equations is used to investigate the diverse and fluctuating conditions within the gut of a broiler, and models the routes of infection between co-housed birds. The presented model provides mechanistic explanations for key infection dynamics that have been long-observed but very poorly understood. We highlight several driving mechanisms behind observed infection phenomena, simulate experimentally observed inter-strain competition, and present a promising approach to hypothesising new methods of preventing flock outbreaks.

## Author summary

The bacteria *Campylobacter* is one of the most common causes of food poisoning globally. The most common route of infection is through raw chicken meat, as a result of many chicken farms across the world housing fully infected flocks. Despite the magnitude of this public health risk, little is understood of the specifics of how chickens become infected, and the ways that they then infect one another. Our work presents a mathematical model of *Campylobacter* transmission dynamics within a flock of chickens. We compare the results of the model to real world data sets, explore key dynamical behaviours, and present a sensitivity analysis to highlight the most important factors underpinning outbreaks.

## Introduction

*Campylobacter* is recognised as the leading cause of human gastroenteritis in the developed world [1]. While several transmission routes have been noted over the years [2], poultry meat has been overwhelmingly attributed as the leading route of ingestion for humans [3]. An ongoing study by Public Health England has highlighted the extent to which *Campylobacter spp.* have dominated our commercial poultry. 73.3% of supermarket chicken carcasses were found to contain *Campylobacter* and 6.8% of the outer packaging was similarly contaminated [4]. An estimated 450,000 people across the United Kingdom are infected every year, with 10% of these infections resulting in hospitalisation [5]. The immediate impact of infection is rarely fatal in the developed world, characterised by stomach cramps and diarrhoea, however the resulting sequelae, while rare, are far more serious. *Campylobacteriosis* leaves the host ~100 times more likely to develop the auto-immune disorder Guillain-Barré syndrome [6].

While the bacteria provoke an aggressive response in human hosts, the most common species, *Campylobacter jejuni*, is commensal within its most common host, broiler chickens. The term ‘broiler’ refers to any chicken bred and raised specifically for meat production. Once *Campylobacter* is present in a flock, full colonisation of all birds occurs very rapidly [7]. From the introduction of one infected bird, it can take only a

single week for an entire flock to become infected [8]. The bacteria are spread via the faecal-oral route. After becoming infected, the newly-infected host broiler spends a brief period in a non-infectious incubation period, before excreting the bacteria in its faecal and cecal matter. Surrounding susceptible broilers are then exposed to this by ingesting the surrounding feed and water [9]. While the direct cause of introduction to the flock is uncertain, an exhaustive review by Adkin et al. (2006) [10] considered that horizontal transmission is by far the most likely route, primarily being brought into a susceptible flock from some other source on the farm, such as the enclosures of other farm animals. This is as opposed to vertical transmission from breeder flocks, which are themselves often fully colonized by *Campylobacter spp.*. Nevertheless, there may be a combination of both routes of entry into a flock, which deserves greater consideration.

*Campylobacter* is very rarely observed to colonise the gut of very young chickens (0 to 2 weeks of age) [11]. This is theorised to be the result of a supply of innate maternal antibodies acquired during a pre-laying period. This immunity has been shown to have significant bactericidal properties [12].

Despite numerous intervention measures being trialled and employed on farms, little impact has been seen in reducing outbreak incidence [13]. This is due in part to the aggressive rate of proliferation once *Campylobacter* has entered a flock, coupled with persisting uncertainty in the exact route of primary infection. Specifically designed prevention methods are also marred by genetic variation and plasticity of *Campylobacter spp.* [14].

Of increasing concern is the growing trend of antimicrobial resistance in *campylobacteriosis* outbreaks. Roughly 90% of the antibiotics applied in agriculture are used only to promote growth or as prophylactic agents, as opposed to being used to treat infection [15]. This overzealous use has been a major contributing factor to the continuing spread of antibiotic resistance. Ge et al. (2003) [16] conducted a study showing that 94% of tested raw chicken samples were resistant to at least one of seven antibiotics being tested, 54% of which showed resistance to erythromycin, the antibiotic most commonly used to treat *campylobacteriosis*. These anti-microbial strains cause

more prolonged and severe illness in humans [17] and create a scenario where *in-vitro* susceptibility testing may be necessary before any drugs may be prescribed.

Despite a wealth of empirical investigations, there is a lack of knowledge synthesising these empirical findings through theoretical modelling frameworks. Only two studies have considered a theoretical approach to understanding *Campylobacter spp.* outbreaks; Van Gerwe et al. (2005) [18] and Hartnett et al. (2001) [19], who built a basic SI model and a probabilistic model, respectively. Both frameworks only consider a model on the scale of a flock through basic susceptible-infected interactions. These approaches are not sophisticated enough to develop any meaningful theories on *Campylobacter* dynamics, as they do not represent or convey any specific interbacterial actions by *Campylobacter* populations. The lack of modelling approaches is likely due in part to the inherent challenges of mathematically simulating a gut microbiome. Over 100 different bacterial genera have been isolated from the intestines of chickens [20], all with a range of individual ecological interactions with one-another. Questions must then be asked regarding how to simulate the temporal and spatial impact of gut motility on the development of a microbial community. Despite these challenges, simplified models of stochastic differential equations have proved effective in capturing the often frenetic bacterial population dynamics within the gut [21].

Here, we introduce a framework of stochastic differential equations that captures the basic interactions that are known to be observed within the broiler gut. Using this framework we simulate the propagation of multiple strains of *Campylobacter* through multiple birds in a flock. In the analysis presented below we observe key dynamical behaviour commonly observed through experimentation, which can now be mechanistically explained using this theoretical framework. The theoretical insights derived from this model can be used to refine current hypotheses regarding *Campylobacter* transmission and inform future experimental and control efforts.

# 1 Modelling Frameworks

81

## 1.1 Deterministic Model

82

Before presenting the stochastic differential equation framework, we begin by introducing the underlying deterministic core of the framework and the particular interactions modelled. Consider four variables to describe the bacterial populations within a broiler's digestive tract.  $C$ , the proportion of a single bird's gut flora made up of *Campylobacter*.  $B$ , the proportion of the gut flora made up of other bacterial species competing for space and resources.  $P$ , the proportion of the gut containing host defence peptides (HDPs) (this may also be interpreted as other plausible forms of host autoimmune response). Lastly,  $M$ , the proportion of the gut containing innate maternal antibodies. These all take values ranging such that  $0 \leq C, B, P, M \leq 1$ . The set of ODEs describing the dynamics follows:

$$\frac{dC}{dt} = r_1 C \left( 1 - \frac{C + \alpha_1 B}{K} \right) - \gamma CP - d_1 C - \beta CB - \sigma CM, \quad (1)$$

$$\frac{dB}{dt} = r_2 B \left( 1 - \frac{B + \alpha_2 C}{K} \right) - d_2 B, \quad (2)$$

$$\frac{dP}{dt} = \xi CP - d_3 P, \quad (3)$$

$$\frac{dM}{dt} = -d_4 M. \quad (4)$$

All rate constants are defined below in Table 1. The first term ( $r_1 C (1 - \frac{C + \alpha_1 B}{K})$ ) in equation (1) describes the logistic growth of *Campylobacter* to a carrying capacity,  $K$ , while in competition with other bacteria  $B$ . Competition for resources is the key to success within the gut. *Campylobacter* is known to be an effective coloniser [22], as it is very effective at drawing zinc [23] and iron [24] from its environment. The second term ( $\gamma CP$ ) in equation (1) models the inhibitory effect of host defence peptides,  $P$ . These peptides are created in response to challenge by *Campylobacter*, as shown by Cawthraw et al. (1994) [25]. The third term ( $d_1 C$ ) of equation (1) simply describes the natural death rate of *Campylobacter*. The fourth term ( $\beta CB$ ) simulates an important interbacterial interaction; that some of the most abundant competing bacteria in the microbiome have an inhibitory effect on *Campylobacter* [26]. The final term ( $\sigma CM$ ) of equation (1) represents the strong bactericidal abilities of the bird's maternal antibodies.

83

84

85

86

87

88

89

90

91

92

93

94

All chickens hatch with an initial supply of antibodies that depletes over time, gone by 95  
about three weeks of age [12] (most broilers are slaughtered at five or six weeks of age, 96  
however some organic and free-range flocks are slaughtered at approximately eight 97  
weeks). These antibodies have a strong inhibitory effect on *Campylobacter*, and many 98  
studies are unable to detect *Campylobacter* (by culture methods) in birds under 2 weeks 99  
of age under commercial conditions [27]. However, forced inoculation of high-quantities 100  
of *Campylobacter* soon after hatching can still result in expression of the bacteria [28]. 101

Equations (2), (3) and (4) follow a similar logic to equation (1). Other bacteria,  $B$ , 103  
grow in competition with *Campylobacter* to a carrying capacity. Defence peptides,  $P$ , 104  
grow in response to *Campylobacter* expression (not in competition for resources), and 105  
the population of maternal antibodies,  $M$ , does not grow. All variables decay at a rate 106  
proportional to their respective populations. 107

Note that the above model could be reduced by amalgamating terms in equations (1) 109  
and (2), however we choose to keep these separate to (i) keep biological processes clearly 110  
defined, and (ii) make further model development and sensitivity analyses clearer. 111

**Fig 1. Deterministic model for one chicken.** An example of the typical dynamical 112  
behaviour observed for simulations of equations (1) - (4). Parameters defined in Table 1.

Ignoring the trivial cases of complete domination by either  $C$  or  $B$ , the basic dynamical 113  
behaviour observed for this simplified model is illustrated in Figure 1. Notably, 114  
*Campylobacter* is absent from the microbiome until the maternal antibody population 115  
has been exhausted. At this point a sudden, temporary, surge in the population of 116  
*Campylobacter* is observed. This phenomena is due to the very low population of HDPs, 117  
caused by the strong effect of the initial maternal antibodies. The HDP population then 118  
quickly rises to meet this sudden challenge, bringing the *Campylobacter* population back 119  
to a lower level in an oscillating manner, where it eventually reaches a steady-state 120  
equilibrium. This behaviour is commonly observed in experimental studies [29] [30]. 121

From this simple core of four equations we adapt the model to allow for  $N$  unique 122

strains of *Campylobacter*, by describing each strain as a separate variable. Equation (1) is repeated for each individual strain, while altering the growth rate terms to reflect the fact that all strains will also be in competition with one another. This alteration is represented by the following set of ODEs:

$$\begin{aligned} \frac{dC_j}{dt} = & r_{C_j} C_j \left( 1 - \frac{\sum_{j=1}^N C_j + \alpha_1 B}{K} \right) - \gamma_{C_j} C_j P - d_{C_j} C_j \\ & - \beta_{C_j} C_j B - \sigma_{C_j} C_j M, \end{aligned} \quad (5)$$

$$\frac{dB}{dt} = r_2 B \left( 1 - \frac{B + \alpha_2 \sum_{j=1}^N C_j}{K} \right) - d_2 B, \quad (6)$$

$$\frac{dP}{dt} = \sum_{j=1}^N \xi_j C_j P - d_3 P, \quad (7)$$

$$\frac{dM}{dt} = -d_4 M. \quad (8)$$

Here  $C_j$  represents the  $j^{\text{th}}$  strain of *Campylobacter*, where  $j \in \{1, 2, \dots, N\}$ , and  $N$  is the total number of strains. As such this adjusted model is composed of  $N + 3$  variables. The next alteration is to allow for multiple birds and the ability for *Campylobacter* to move from one bird to another. This is done by repeating the  $N + 3$  equations presented in equations (5)-(8) for each bird, and introducing new variables to display the saturation of *Campylobacter* strains in the shared living space.

As such, the newly adjusted model to describe the population dynamics of  $N$  strains of

*Campylobacter* within  $L$  broilers, is written as,

$$\frac{dC_{ij}}{dt} = r_{C_j} C_{ij} \left( 1 - \frac{\sum_{j=1}^N C_{ij} + \alpha_1 B_i}{K} \right) - \gamma_{C_j} C_{ij} P_i - d_{C_j} C_{ij} - \beta_{C_j} C_{ij} B_i - \sigma_{C_j} C_{ij} M_i + a \frac{E_j}{\Omega}, \quad (9)$$

$$\frac{dB_i}{dt} = r_2 B_i \left( 1 - \frac{B_i + \alpha_2 \sum_{j=1}^N C_{ij}}{K} \right) - d_2 B_i, \quad (10)$$

$$\frac{dP_i}{dt} = \sum_{j=1}^N \xi_j C_{ij} P_i - d_3 P_i, \quad (11)$$

$$\frac{dM_i}{dt} = -d_4 M_i, \quad (12)$$

$$\frac{dE_j}{dt} = \sum_{i=1}^L b C_{ij} \left( 1 - \frac{E_j}{\Omega} \right) - d_5 E_j. \quad (13)$$

Here then,  $C_{ij}$  represents the proportion of the  $i^{\text{th}}$  broiler's gut bacteria which is composed of *Campylobacter* strain  $j$ .  $B_i$  is the proportion of the  $i^{\text{th}}$  broiler's gut bacteria made up of other bacterial species competing for space and resources.  $P_i$ , the proportion of the  $i^{\text{th}}$  broiler's gut containing host defence peptides.  $M_i$  is the proportion of the  $i^{\text{th}}$  broiler's gut containing innate maternal antibodies. Here  $i \in \{1, 2, \dots, L\}$ , where  $L$  is the total number of broilers.  $E_j$  represents the amount of *Campylobacter* strain  $j$  that is currently in the flock's enclosed living space. We assume a living space of fixed size shared by all broilers. As such,  $\Omega$  represents this total size, or carrying capacity for strains. The first term in equation (13) shows that the amount of strain  $j$  in the environment is increased by being shed from birds that are already infected with strain  $j$  at a rate  $b$ . Note from the final term  $\left( a \frac{E_j}{\Omega} \right)$  in equation (9) that birds may then ingest strain  $j$  from the environment at a rate  $\frac{a}{\Omega}$ . This route of infection simulates the faecal-oral route of infection, but may be interpreted as some other intermittent transmission stage between birds. The model is now composed of  $L(N + 3) + N$  equations, for  $N$  strains of *Campylobacter*, and  $L$  individual broilers.

## 1.2 Stochastic Model

While several important biological phenomena can be discovered and better understood with the model in its current, deterministic, form, there are key reasons to pursue a stochastic framework. First, having one variable alone to represent the multitudes of



bacterial species that make up the constantly-evolving gut microbiome is, of course, a  
significant simplification. In practise, these other bacterial species competing with  
*Campylobacter* will be constantly changing, both in resurgences of population and in  
how they interact with *Campylobacter*. Adding stochastic elements to these populations  
and interactions is a small step towards capturing some of this more unpredictable  
behaviour. Indeed the biomass of *Campylobacter* measurable in faecal and cecal matter  
has been observed to fluctuate widely [29] [31]. Secondly, the law of mass action  
assumptions made when formulating the initial deterministic model are assumptions  
that break down for smaller populations. The simulations undertaken often display  
bacterial populations at very small quantities, especially in the initial period dominated  
by maternal antibodies. A stochastic system behaves very differently under these  
circumstances and means that the model is more likely to display cases of strain  
extinction, a phenomena that the deterministic model cannot capture. Indeed, the very  
nature of *Campylobacter* infections is one that is often described in the language of  
probability. The all-or-nothing nature of flock infections means that we often must ask  
what measures can reduce the likelihoods of infections, rather than the magnitude.  
Through a stochastic framework we explore multiple realisations of potential outcomes,  
and investigate reducing the likelihood of outbreaks.

For the stochastic framework, equations (9)-(13) are adjusted to the following set of

stochastic differential equations,

$$dC_{ij} = \left[ r_{C_j} C_{ij} \left( 1 - \frac{\sum_{j=1}^N C_{ij} + \alpha_1 B_i}{K} \right) - \gamma_{C_j} C_{ij} P_i - d_{C_j} C_{ij} - \beta_{C_j} C_{ij} B_i - \sigma_{C_j} C_{ij} M_i + a(E_j) \right] dt + [\eta_{C_j} C_{ij} + \lambda_j(t) - \eta_{BC_j} C_{ij} B_i] dW_t, \quad (14)$$

$$dB_i = \left[ r_2 B_i \left( 1 - \frac{B_i + \alpha_2 \sum_{j=1}^N C_{ij}}{K} \right) - d_2 B_i \right] dt + [\eta_2 B_i] dW_t, \quad (15)$$

$$dP_i = \left[ \sum_{j=1}^N \xi_j C_{ij} P_i - d_3 P_i \right] dt + [\eta_3 P_i] dW_t, \quad (16)$$

$$dM_i = [-d_4 M_i] dt + [\eta_4 M_i] dW_t, \quad (17)$$

$$dE_j = \left[ \sum_{i=1}^L b C_{ij} \left( 1 - \frac{E_j}{\Omega} \right) - d_5 E_j \right] dt + [\eta_5 E_j] dW_t, \quad (18)$$

where  $\lambda_j(t)$  is defined by;

$$\lambda_j(t) = \begin{cases} 0, & \text{if } C_{ij}(t) = 0. \\ 0.00025, & \text{otherwise.} \end{cases}$$

and where  $a(E_j)$  is defined by;

$$a(E_j) = \begin{cases} 0.015, & \text{if } X < \frac{E_j}{\Omega} \text{ for random variable } X \sim \mathcal{U}(0, 1). \\ 0, & \text{otherwise.} \end{cases}$$

The stochastic additions in equations (15) - (18) are a Wiener process applied to the population (standard Brownian motion process), scaled by the respective population size and constants  $\eta_2$  through to  $\eta_5$ . These constants dictate the variance of their respective Wiener processes, defining the range of stochasticity attributed to the growth rate of their respective variables. The changes and additions shown in equation (14) warrant further explanation. The sixth term ( $a(E_j)$ ) in equation (14) (the last of the deterministic terms), has been changed from a constant rate of ingestion from the environment, as seen in equation (9), to instead have ingestion modelled by a chance to ingest *Campylobacter* depending on the amount of that strain in the environment,  $E_j$ .

The greater  $E_j$  is, the more likely it is for ingestion to occur.

The eighth term ( $\lambda_j(t)$ ) in equation (14) is a Wiener process independent of the population of  $C_{ij}$ . This is introduced to allow for the possibility of extinction events, should the population of  $C_{ij}$  reach a particularly low threshold. This threshold is decided by the value taken by  $\lambda_j(t)$ , in this case 0.00025. Finally, the ninth term of equation (14) applies a Wiener process around the interactions between  $C_{ij}$  and the competing bacteria  $B_i$ . This term allows for instances when the particular biodiversity and spatial structure of the gut microbiome may be more inhibitory towards *Campylobacter*, or perhaps actually assisting its growth instead.

**Table 1. Model parameters and baseline values.** Descriptions for all parameter values appearing in the final stochastic model, equations (14) - (18). Baseline values are given, used for model validation and simulation case studies. \*  $\Omega$  value is dependent on the experiment specifics for model validation, but flock case studies consider a flock of 400 chickens, and an  $\Omega$  value of 200,000.

| Expression     | Description                                                                                       | Value    |
|----------------|---------------------------------------------------------------------------------------------------|----------|
| $r_{C_j}$      | Growth rate for <i>Campylobacter</i> strain $j$ .                                                 | 0.27     |
| $r_2$          | Growth rate for other bacteria ( $B$ ).                                                           | 0.15     |
| $\alpha_1$     | <i>Campylobacter</i> competition coefficient.                                                     | 0.92     |
| $\alpha_2$     | Other bacteria competition coefficient.                                                           | 1        |
| $K$            | Carrying capacity.                                                                                | 1        |
| $\gamma_{C_j}$ | Rate of inhibition by host defence peptides ( $P$ ) on <i>Campylobacter</i> strain $j$ .          | 0.2      |
| $\xi_j$        | Rate of host defence peptide growth in response to <i>Campylobacter</i> strain $j$ .              | 0.4      |
| $b$            | Rate of broiler shedding <i>Campylobacter</i> into the environment, $E_j$ .                       | 10       |
| $\Omega$       | Total environmental carrying capacity of <i>Campylobacter</i> .                                   | 200,000* |
| $d_{C_j}$      | Death rate of <i>Campylobacter</i> strain $j$ .                                                   | 0.02     |
| $d_2$          | Death rate of other bacteria.                                                                     | 0.02     |
| $d_3$          | Decay rate of host defence peptides.                                                              | 0.05     |
| $d_4$          | Decay rate of maternal antibodies.                                                                | 0.005    |
| $d_5$          | Death rate of <i>Campylobacter</i> in the environment.                                            | 0.05     |
| $\beta_{C_j}$  | Rate of inhibition by other bacteria on <i>Campylobacter</i> strain $j$ .                         | 0.03     |
| $\sigma_{C_j}$ | Rate of inhibition by maternal antibodies on <i>Campylobacter</i> strain $j$ .                    | 0.07     |
| $\eta_{C_j}$   | Scaling factor applied to stochastic <i>Campylobacter</i> growth in the gut.                      | 0.01     |
| $\eta_{BC_j}$  | Scaling factor applied to stochastic <i>Campylobacter</i> inhibition by other competing bacteria. | 0.09     |
| $\eta_2$       | Scaling factor applied to stochastic competing bacteria ( $B$ ) growth.                           | 0.01     |
| $\eta_3$       | Scaling factor applied to stochastic host defence peptide ( $P$ ) growth.                         | 0.01     |
| $\eta_4$       | Scaling factor applied to stochastic maternal antibody ( $M$ ) decay.                             | 0.01     |
| $\eta_5$       | Scaling factor applied to stochastic <i>Campylobacter</i> growth in the environment.              | 0.01     |

Several interesting dynamical behaviours can be observed using this model, which are highlighted through some specific question-led case studies. Table 1 defines all parameters presented in the final stochastic model ((14) - (18)) as well as a baseline of

parameter values that were used in model validation against real world data sets (presented below). The model is constructed to an arbitrary timescale, however the parameter values given in Table 1 ensure that multiple oscillations in the *Campylobacter* population can be observed in the below case studies, a phenomena observed in the lifespan of broilers [31]. Broilers are usually slaughtered at approximately five weeks of age, and maternal antibodies ( $M$ ) are usually depleted after approximately three weeks.

Note that throughout we have chosen to use a *Campylobacter* competition coefficient of  $\alpha_1 = 0.92 < 1$ . This choice is justified in that bacterial populations can inhabit multiple intestinal niches that cannot be colonised by other competing bacteria. Indeed competitive exclusion therapies have been far less effective in tackling *Campylobacter* compared to other foodborne illnesses such as *Salmonella* [32]. The deterministic model is solved using the ode45 solver, a fifth-order Runge-Kutta method in Matlab. The stochastic model is solved numerically using the Euler-Maruyama method [33] with  $N = 2^{14}$  timesteps, also programmed in Matlab. The code used to produce all figures presented is available at: <https://osf.io/b3duc/>.

### 1.3 Model Validation

We test our model by comparing its predictions against three experimental studies on *Campylobacter* expression and spread. Firstly, we consider the work of Achen et al. (1998) [29]. Achen et al. performed an experiment with twenty-four broilers, who were kept in individual, isolated wire-bottomed cages. Birds were confirmed as free of *Campylobacter* before being inoculated with a *C. jejuni* suspension. A cloacal swab was then obtained from each bird every day for forty two days, to monitor whether or not each bird was shedding *Campylobacter*. Figure 2 shows their experimental results alongside the predictions made by our model.

**Fig 2. Model validation against data of Achen et al. (1998) [29].** A graph plotting the percentage of a group of isolated broilers shedding *Campylobacter* across several weeks following inoculation.

Specifically, the blue line represents the modal value of the percentage of the 24 birds

shedding across a thousand simulations, with error bars depicting the standard deviation across these simulations. Achen et al. (1998) also reports how most birds would shift from phases of positive shedding to negative shedding, a phenomena also captured by the oscillating behaviour displayed by the model. Sampling via culture methods like those performed in this experiment is prone to false-negative results for samples with very low quantities of *Campylobacter* [34]. Therefore, for this model validation, we considered a broiler as being clear of *Campylobacter* if its proportion of *Campylobacter* (variable  $C$ ) was below 0.005. This was considered a more accurate measure to correspond with the experimental data. While our model was constructed to an arbitrary timescale, comparing to this real-world data set it was found that our timescale is approximately equal to  $t = 1 \sim 30$  minutes.

Secondly, we consider the experiment conducted by Stern et al. (2001) [8]. Multiple separates pens were prepared, each containing 70 broilers, all free of *Campylobacter*. A *Campylobacter*-positive seeder bird was then added to the flock. Different pens had seeder birds introduced at different points in time. 3, 5 and 7 days after a seeder bird was introduced, a sample of chickens were tested for *Campylobacter* to estimate the percentage of the flock that was currently *Campylobacter*-positive. We plot our model predictions against Stern et al.'s (2001) experimental data below in Figure 3. To match the housing density of the experiment, a value of  $\Omega = 45,369$  was used for the model. An error band is plotted around our model prediction displaying the standard deviation of values across 100 simulations.

**Fig 3. Model validation against data of Stern et al. (2001) [8].** Graphs plotting the percentage of a flock of broilers shedding *Campylobacter* across several weeks after introduction of a *Campylobacter*-positive seeder bird at (A) seven days, (B) fourteen days, (C) twenty one days, (D) twenty eight days.

Lastly we simulated the experiment performed by Van Gerwe et al. (2005) [18]. Four flocks of 400 birds were set up in individual enclosures from day of hatch. Four birds in each flock were then inoculated with a *Campylobacter* suspension and returned to the flock. Birds were then sampled from each flock throughout the next few weeks to record the percentage of flock infection. Figure 4 plots their experimental data against our

model prediction. For the experiments shown in Figure 4A and Figure 4B, the four  
seeder birds were inoculated at day of hatch, and chickens were sampled by cloacal  
swabbing. For the experiments shown in Figure 4C and Figure 4D, the seeder birds  
were inoculated one day after hatch, and the flock was analysed by collecting fresh fecal  
samples.

**Fig 4. Model validation against data of Van Gerwe et al. (2005) [18].** Graphs plotting the percentage of a flock of broilers shedding *Campylobacter* across several weeks after introduction of a *Campylobacter*-positive seeder bird. (A)/(B) Seeder bird introduced at day of hatch, samples collected via cloacal swab, (C)/(D) seeder bird introduced one day after hatch, samples collected via fresh fecal droppings.

## 2 Simulations

We now use a series of (simulated) case studies to investigate key dynamical behaviours and predictions from the model.

### 2.1 Staggered Strain Infection

In this first example, the deterministic model for multiple strains in one broiler (equations (5) - (8)) is considered. Five strains of *Campylobacter* within one chicken are simulated, all with the exact same respective rate constants as shown in Table 1. Figure 5A shows the results when all five strains are introduced at  $t = 0$  with the same initial inoculation amount of  $C_i(0) = 0.0001$ . Figure 5B shows instead when each strain is introduced in intervals of  $t = 250$ . Therefore only strain 1 is introduced at  $t = 0$ , strain 2 is introduced at  $t = 250$  and so on until finally strain 5 is introduced at  $t = 1000$ . In both cases the other three variables are initialised at  $B(0) = 0.4$ ,  $P(0) = 0.01$  and  $M(0) = 0.5$ .

**Fig 5. Simulations of multiple *Campylobacter* strains within one broiler.** Population growth of five strains of *Campylobacter* within one broiler that are (A) all introduced at  $t = 0$  (B) introduced in intervals of  $t = 250$ . Strains are initialised at  $C_j(t) = 0.0001$  at their respective time of introduction. Other variables are initialised at  $B(0) = 0.4$ ,  $P(0) = 0.01$  and  $M(0) = 0.5$ . Note that the single green line in Figure 5A is due to overlap, all five strains exhibit the exact same dynamical behaviour, as would be expected.

While the maternal antibodies ( $M$ ) are not plotted on these figures, they approach 0 at approximately  $t = 1,000$ , as can be seen by the following surge in *Campylobacter* populations following this point in Figure 5. While, unsurprisingly, all strains perform identically in figure 5A (where strains are initialised at the same point in time), a more curious dynamic is observed in Figure 5B. The strain that performs best and exists at the highest proportion in the staggered release example is strain 2, the second strain to be introduced. The reason for this is that strain 1, present at  $t = 0$ , is initially suppressed by the maternal antibodies (parameter  $M$ ), reducing the proportion of strain 1. As a result, when strain 2 is introduced, it is able to capitalise on the severely reduced amount of strain 1, and the reduced amount of maternal antibodies, to quickly grow and dominate the competitive space. Strain 2's increased presence then puts future strains at a disadvantage as it has already had the opportunity to establish itself within the gut. These results suggest that dominant *Campylobacter* strains can prevent new strains from taking hold. Moreover, there is an optimal point in time for inoculation to occur for a strain to become dominant, as shown in Figure 5B where strain 2 is consistently occupying a higher proportion of the gut than other strains.

## 2.2 Stochastic model - One strain in one broiler

The stochastic model (equations (14) - (17)) is run to simulate one strain of *Campylobacter* within one broiler. In this scenario, we ignore the environmental variable  $E$  (equation (18)), as its input is negligible for only one broiler. The rate constants are kept at the same values as used previously, defined in Table 1, with the additions of the stochastic variance scaling rate constants, parameters that limit the variance of the stochastic additions. These are set as  $\eta_{C_j} = \eta_2 = \eta_3 = \eta_4 = 0.01$ , and  $\eta_{BC_j} = 0.09$ .  $\eta_{BC_j}$  is set higher than the other stochastic rate constants to capture the greater unpredictability surrounding these bacterial interactions. Four different realisations of this model are presented in Figure 6, all initialised at  $C(0) = 0.02$ ,  $B(0) = 0.4$ ,  $P(0) = 0.01$ ,  $M(0) = 0.5$ .

**Fig 6. Stochastic simulations of one *Campylobacter* strain within one broiler.** Four different realisations of a stochastic model simulating one strain of *Campylobacter* within one isolated broiler.

Empirical studies measuring the amount of *Campylobacter* in the faecal matter of 295  
isolated broilers have shown a spectrum of results. Some broilers display sustained high 296  
populations, others express initial peaks followed by great reduction and potentially 297  
later resurgence, and sometimes extinction cases are observed [29]. All these dynamical 298  
behaviours can be observed in different realisations of this model (Figure 6). Figure 6A 299  
shows an instance where a broiler is consistently infected and shedding into the 300  
environment, unable to effectively clear the *Campylobacter* from its system. Figure 6B 301  
instead shows an instance where a broiler has multiple periods of high infection and 302  
shedding, before being able to clear the infection. Figure 6C shows similar behaviour to 303  
6A, whereby the broiler is unable to clear the bacteria, however 6C shows more dramatic 304  
peaks and troughs in its dynamic profile, suggesting it may have longer periods of 305  
reduced shedding. Finally, Figure 6D shows an instance where the broiler successfully 306  
clears *Campylobacter* at the initial point of inoculation. All these realisations are run 307  
with the same parameters given in Table 1, demonstrating the benefit of a stochastic 308  
framework being able to better capture the more diverse range of possible events. 309

### 2.3 Stochastic model - One strain in multiple broilers 310

The previous scenario is now extended to consider multiple broilers. Figure 7 presents 311  
the results for one *Campylobacter* strain in a flock of 400 broilers. We use the parameter 312  
values stated in Table 1. The total size of the enclosure, or the carrying capacity of  $E$ , 313  
is set at  $\Omega = 200,000$ . This value is considered in  $\text{cm}^2$ , and so with 400 broilers, 314  
translates to  $500\text{cm}^2$  per broiler. EU directive 2007/43/CE states that broilers may 315  
never be stocked at more than  $42\text{kg}/\text{m}^2$  [35]. Assuming a targeted bird weight of  $1.5\text{kg}$ , 316  
this translates to  $357\text{cm}^2$  per bird. This simulation models slightly more space allowed 317  
to each bird than the limit. The death rate of *Campylobacter* in the environment is set 318  
at  $d_5 = 0.05$ , higher than the death rate within a broiler as, despite their many survival 319  
mechanisms [36] *Campylobacter* is susceptible to many exterior environmental 320  
stresses [37] and is exceptionally fragile outside of its host. The simulation began with 321  
no *Campylobacter* in the surrounding environment ( $E(0) = 0$ ) and the other initial 322  
conditions are set the same as for the previous example, with the exception that two of 323  
the 400 broilers start with an initial condition of  $C_1(0) = C_2(0) = 0.02$ , while the others 324



are initialised without any *Campylobacter*. These results are shown in Figure 7. 325

**Fig 7. Stochastic simulations of one *Campylobacter* strain within multiple broilers.** The proportion of a broiler's gut containing *Campylobacter* for (A) a broiler in the flock initialised with a small proportion of *Campylobacter* (B) a broiler in the flock initialised with no *Campylobacter*. (C) shows how much of the environment (total size of 200,000) contains *Campylobacter*. This is variable  $E$  in the model. 326

While birds who are not initialised with *Campylobacter* become infected at a slightly 327  
later time, the dynamical behaviour is very similar across all birds in the flock. Multiple 328  
realisations do not display the broader spectrum of behaviour observed in the one 329  
broiler case (Figure 6). The implication is that housing a greater number of birds causes 330  
more homogeneous dynamical behaviour, and indeed the wide variety of *Campylobacter* 331  
expression seen in the isolated bird experiments of Achen et al. (1998) [29] is not so 332  
commonly observed in experiments with group-housed birds [18]. 333

## 2.4 Stochastic model - Five strains in multiple broilers 334

We extend the previous scenario to investigate dynamics of multiple strains. Five 335  
strains of competing *Campylobacter* are modelled within the same flock of 400 birds. 336  
The same constants are used as in the previous scenario, with each strain having 337  
identical rate constants. One key difference is that all broilers are initialised without 338  
any *Campylobacter*, instead an initial amount is present in the environment. Each strain 339  
of *Campylobacter* in the environment is initialised at 340  
 $E_1(0) = E_2(0) = E_3(0) = E_4(0) = E_5(0) = 100$ . The results of this simulation are 341  
shown in Figure 8. 342

**Fig 8. Stochastic simulations of multiple *Campylobacter* strains within multiple broilers.** The proportion of four different broilers' microbiomes that contain five strains of *Campylobacter*. All birds are within the same flock. (E) shows how much of the environment (total size of 200,000) contains the five strains of *Campylobacter*. These are variables  $E_j$  in the model. 343

On average, all strains perform equally well across the flock, as shown in Figure 8E. All 344  
strains are present at roughly equal amounts in the environment, reflecting an equal 345  
presence on average across all birds in the flock. However, when observing the 346  
*Campylobacter* proportions within individual broilers, one or two strains will tend to 347  
dominate early on in colonising a broiler's gut, which can in turn prevent other strains 348

from taking hold (seen most clearly in Figure 8C). This dynamical behaviour was first  
observed in our deterministic simulations (see Figure 5B), however unlike in the  
deterministic case, stochastic events can cause dominant *Campylobacter* strains to  
reduce in population, presenting an opportunity for a different strain to establish itself.

This phenomena is more clearly seen if the timescale of the simulation is extended, as  
illustrated in Figure 9. Although the average population of strains across the flock is  
equal, the stochastic model shows that a single strain of *Campylobacter* tends to  
dominate the gut of individual broilers at any one time. Although there are brief  
periods where strains exist in equal amounts, eventually the balance shifts again to  
longer periods of dominance by one or perhaps two strains.

**Fig 9. Stochastic simulations of multiple *Campylobacter* strains within multiple broilers across a greater timescale.** The proportion of two different broilers' microbiomes that contain five identical strains of *Campylobacter*.

Disadvantaged strains of *Campylobacter* are quickly eliminated. Figure 10 shows the  
results for a simulation where strain 4's growth rate,  $r_{C_4}$ , is reduced from 0.27 to 0.265,  
and strain 5's growth rate,  $r_{C_5}$ , is reduced to 0.26. Strains 1, 2 and 3 are kept with a  
growth rate of 0.27. As Figure 10 shows, the weaker strains are unable to outcompete  
the other three and are quickly eliminated. Changing other constants relating to the  
fitness of a strain achieve similar effects, the phenomenon is not unique to only altering  
the growth rate. Making only very small reductions to the growth rate can result in a  
strain surviving at a lower average population size, although this may only be due to  
the time needed for extinction to occur being too long to observe in these simulations.

**Fig 10. Stochastic simulations of multiple *Campylobacter* strains, differing in growth rates, within multiple broilers.** The proportion of four different broilers' microbiomes that contain five strains of *Campylobacter*. Strain 4 has had its growth rate reduced from 0.27 to 0.265 and strain 5 has had its growth rate reduced to 0.26. Strains 1, 2 and 3 have a growth rate of 0.27. (E) shows how much of the environment (total size of 200,000) contains the five strains of *Campylobacter*. These are variables  $E_j$  in the model.

### 3 Sensitivity Analysis

A powerful use of this model is to conduct a robust sensitivity analysis to identify the parameters of greatest impact in driving outbreaks of *Campylobacter*. We adopt a variance-based analysis of the model, and investigate the likelihood of flocks remaining free of *Campylobacter* based on a random assignment of parameter values.

We consider the case of a flock of broilers infected with a single strain of *Campylobacter*, the scenario shown in section 2.3. Model parameters are sampled randomly from a uniform range, and the model is run multiple times for these values. We then record how many of these stochastic runs resulted in the flock successfully eliminating *Campylobacter* infections, before drawing a new random sample of parameters values and repeating as necessary. Eventually we finish with a final data set which we display an example of below in Figure 11.

**Fig 11. Scatter plots displaying probability of a flock clearing *Campylobacter* infection against randomly sampled parameter values.** Each scatter plot depicts the results for a specific parameter value. Probability is calculated by running the model for a sampled parameter set twenty times, and recording how many of those runs resulted in the flock not becoming infected with *Campylobacter*.

As such, the most “important” parameters will be the ones which exhibit a strong trend in their scatter plot. A seemingly randomly distributed scatter plot would indicate a parameter value which has little impact on our output. To report more accurately this measure we use the first-order sensitivity index,  $S_i$ , and the total effect index,  $S_{T_i}$ , defined as:

$$S_i = \frac{V_{X_i}(E_{X_{\sim i}}(Y|X_i))}{V(Y)}, \quad S_{T_i} = \frac{E(V(Y|X_{\sim i}))}{V(Y)},$$

where  $X_i$  denotes parameter  $i$ , and  $Y$  denotes the model output.  $X_{\sim i}$  denotes the vector of all factors but  $X_i$ .  $V(\cdot)$  denotes the variance, and  $E(\cdot)$  the expectation. Specifically  $E(A|B)$  denotes the expectation of variable A when B is held fixed. In short  $S_i$  will measure the changes observed in the output when parameter  $X_i$  is kept fixed, while  $S_{T_i}$  measures the changes to the output when all other parameters are kept fixed. A full derivation and explanation can be found in Saltelli et al. (2008) [38]. In short,

both are values that range from zero to one, that explain the impact of a parameter on the model output. The higher the value, the more “important” the parameter is.  $S_{T_i}$  is considered a stronger metric, as it also considers the higher-order impact of a parameter, whereas  $S_i$  only considers the immediate first-order impact. As such  $S_i$  would be a sufficient measure for a linear model, but for a more complex model such as the one presented in this paper,  $S_{T_i}$  can better reveal the impact that each parameter plays. An initial sensitivity analysis was run for twenty parameters with 1,000 parameter set samples, drawn from a quasi-random Sobol set [38]. The results of this analysis are displayed in Table 2, and the code used to produce them is available to access at: <https://osf.io/b3duc/>.

**Table 2. Sensitivity analysis of parameters in a stochastic model for one *Campylobacter* strain in a flock of broilers.** The first-order sensitivity index and total effect index is given for a sensitivity analysis of 1,000 runs for 20 parameters. The output function considered is the probability of *Campylobacter* going extinct within the flock based on the given parameter set.

| $S_i$   | Parameter   | $S_{T_i}$ | Parameter   |
|---------|-------------|-----------|-------------|
| -0.1246 | $\xi$       | 0.0945    | $\eta_{BC}$ |
| -0.1168 | $d_4$       | 0.1038    | $\eta_4$    |
| -0.1164 | $\eta_2$    | 0.1059    | $\gamma_C$  |
| -0.1161 | $\eta_C$    | 0.1098    | $\eta_6$    |
| -0.1144 | $a$         | 0.1143    | $\sigma_C$  |
| -0.1124 | $\eta_4$    | 0.1144    | $b$         |
| -0.1117 | $\eta_6$    | 0.1256    | $d_4$       |
| -0.1110 | $\sigma_C$  | 0.1340    | $\Omega$    |
| -0.1081 | $r_C$       | 0.1476    | $a$         |
| -0.1076 | $\gamma_C$  | 0.1510    | $\eta_3$    |
| -0.0975 | $\Omega$    | 0.1551    | $\eta_2$    |
| -0.0786 | $\eta_3$    | 0.1678    | $\eta_C$    |
| -0.0759 | $b$         | 0.2035    | $d_5$       |
| -0.0658 | $\eta_{BC}$ | 0.2151    | $d_C$       |
| -0.0638 | $d_5$       | 0.2470    | $\xi$       |
| -0.0474 | $d_C$       | 0.2560    | $r_C$       |
| -0.0340 | $d_3$       | 0.3635    | $d_3$       |
| 0.0076  | $d_2$       | 0.4170    | $\beta_C$   |
| 0.0396  | $\beta_C$   | 0.4808    | $d_2$       |
| 0.0892  | $r_2$       | 0.6897    | $r_2$       |

Specifically, our objective function will run the stochastic model for a flock of chickens with the random parameter set drawn. If this model run results in no *Campylobacter* being present in the flock, it is considered to have successfully eliminated infection. The

model is run twenty times with this parameter set, and the proportion of these twenty runs that results in an elimination of *Campylobacter* is the final output value, the ‘probability of flock clearing infection’.

Note that many of the  $S_i$  values in Table 2 are negative, despite  $S_i$  being limited to being between zero and one. This is due to the computational error in estimating the value, however the ordering of parameters for these particular runs will not be affected by this error. Table 2 shows that the  $S_{T_i}$  values associated with most parameters ranges between 0.1 and 0.2. The “most important” parameters however have a wider spread of associated  $S_{T_i}$  values. Stochastic simulations in particular are intensely computationally expensive, and as such, we run our sensitivity analysis a second time with a larger number of samples, using a reduced parameter set based on the initial sensitivity analysis, which we present in Table 3. We focus on the eight most important parameters from Table 2, as their sensitivity indices were highest and most varied, suggesting their impact was most distinguishable from the other parameters.

**Table 3. Repeated sensitivity analysis of parameters in a stochastic model for one *Campylobacter* strain in a flock of broilers.** The first-order sensitivity index and total effect index is given for a sensitivity analysis of now 4,000 runs for 8 parameters. The output function considered is the probability of *Campylobacter* going extinct within the flock based on the given parameter set.

| $S_i$   | Parameter | $S_{T_i}$ | Parameter |
|---------|-----------|-----------|-----------|
| -0.0001 | $\xi$     | 0.0624    | $d_5$     |
| 0.0011  | $d_C$     | 0.0750    | $\xi$     |
| 0.0020  | $d_5$     | 0.1667    | $d_3$     |
| 0.0027  | $d_3$     | 0.1989    | $d_C$     |
| 0.0077  | $r_C$     | 0.3041    | $r_C$     |
| 0.0557  | $d_2$     | 0.4929    | $\beta_C$ |
| 0.0599  | $\beta_C$ | 0.5309    | $d_2$     |
| 0.1826  | $r_2$     | 0.6794    | $r_2$     |

The main result from these analyses is that the growth, death and inhibition rates of the other bacteria present in a broiler’s gut (parameters  $r_2$ ,  $d_2$  and  $\beta_C$ ) have the largest impact in eliminating *Campylobacter* from a flock. As such, we can begin to consider which preventative methods could best take advantage of this heightened sensitivity.

## 4 Discussion

Here, we have investigated the dynamics of *Campylobacter* across a range of model applications. Our framework reveals several key dynamics of microbial interaction that explain many experimentally observed phenomena. This presents promising new approaches to understanding and tackling this bacteria.

First, the most apparent prediction is that the *Campylobacter* population is successfully suppressed by the innate maternal antibodies (an experimentally observed phenomenon [39]), until these antibodies are eventually removed from the system. At this point an initial surge in the population of *Campylobacter* is observed, before it comes to rest at a lower level, reaching an equilibrium with the broiler's immune-response. This can be seen in all of the above figures, but most clearly in Figure 1. This initial surge creates an interesting opportunity for certain strains of *Campylobacter* to emerge as an early dominating strain. Figure 5B shows that, due to the antibacterial properties of a broiler's maternal antibodies, any strains that infect a broiler early on in its lifespan will be heavily inhibited. This creates a brief window at the point in which maternal antibodies have depleted, whereby any new strain introduced is observed to quickly colonise and dominate the gut flora, suppressing other strains (see Figure 10C). This hypothesis has been verified experimentally [39].

The proposition of damped oscillations between *Campylobacter* population size and the host's immune-response is better reinforced by observations that host antibody populations will also oscillate in birds infected with *Campylobacter* [25]. This basic interaction has been experimentally observed by Achen et al. (1998) [29], with a high degree of variability between birds. This variability is better captured by the stochastic model, as shown in Figure 6. Indeed, many birds in Achen et al.'s study are shown to successfully clear *Campylobacter* from their system, a result rarely observed on commercial broiler farms. Likewise this result was only observed in the model case of individual, isolated broilers (see Figure 6D).

Most important is the mechanism observed in Figure 7, where the broad spectrum of

oscillatory behaviour observed within a broiler is greatly reduced in a large flock of 455  
birds. Indeed the vast examples of individual dynamics observed in Figure 6, large 456  
oscillations and perhaps extinctions, are completely replaced by the same, homogenised 457  
dynamics seen within flock-reared birds in Figures 7A and 7B, as the populations of 458  
*Campylobacter* within each bird are consistently reinforced by the amount of 459  
*Campylobacter* in the environment. The wealth of experiments in monitoring flock 460  
*Campylobacter* expression for varying flock sizes means this effect can be observed 461  
taking place across multiple experiments of different flock magnitudes and densities. 462  
Morishita et al. (1997) [31] measured the amount of *Campylobacter* in a flock of thirty 463  
birds in a sizeable pen. This flock was small enough to observe oscillating behaviour in 464  
the prevalence of *Campylobacter*, and yet there do not appear to be any clear cases of 465  
birds being able to clear the bacteria from their system. Stern et al. (2001) [8] 466  
experimented with flocks of 70 birds at a density of 15.4 birds/m<sup>2</sup>. A small cyclic 467  
pattern is observable in their results but there are clearly far higher incidence rates. 468  
Lastly, Van Gerwe et al. (2005) [18] studied flocks of 400 birds housed at 20 birds/m<sup>2</sup> 469  
(the same density considered in the above flock modelling), where now no cyclic 470  
patterns can be observed, and all birds quickly reach a constant state of *Campylobacter* 471  
expression. This effect is seen in Figure 7, and almost always observed in commercial 472  
farms [7] [40]. Our work presented here is the first, to our knowledge, to be able to 473  
propose a mechanistic explanation for this observed effect. 474

This dynamic, whereby broilers are consistently infected with *Campylobacter* due to 475  
highly contaminated living space, can also explain the observed phenomena whereby 476  
broiler breeder flocks (flocks kept for the breeding of meat birds) display a consistently 477  
lower *Campylobacter* prevalence rate than commercial broiler flocks [41]. Breeder birds 478  
will regularly move between periods of testing positive and negative for *Campylobacter*, 479  
inconsistently with the state of other birds in the flock, unlike the much younger birds 480  
grown for meat which remain consistently positive. Our case studies suggest that this 481  
may be due to the lower stocking density afforded to breeder birds, as it would appear 482  
the route of infection between breeder birds is weaker than that between broilers. Our 483  
sensitivity analysis however also highlighted that the gut flora can have a strong impact 484  
on the survival of *Campylobacter*. The differences in diet and management practise for 485  
486

breeder birds likely results in a different variety of bacterial colonies to broilers, which  
could also be a cause of the differences seen between breeders and broilers in  
*Campylobacter* expression.

Over time, our model shows strains of equal fitness will tend to settle at equal levels of  
prevalence on average across a flock (Figure 8E), a result that has also been shown  
experimentally [42] [43]. However, it is very common for an individual broiler to have  
only one or two dominant strains against far smaller proportions of other strains  
(Figures 8A - 8D and Figure 9). This effect is most prominently seen early on in the  
chicken's lifespan, where usually only one strain will be present during the initial  
population surge of *Campylobacter*. Evidently, when one strain is already  
well-established within a chicken's gut, it is difficult for a new competing strains to  
grow. This is due to the broiler already having a heightened level of immune response  
( $P$ ) due to the currently present strain. In the deterministic case, later strains would  
never be able to establish themselves as much as strains that were earlier to arrive  
(Figure 5B). However, in the stochastic model, there is the potential for a stochastic  
event to reduce the population of the currently dominating strain, and increase the  
population of a less-established strain.

Across the whole flock, weaker strains can be quickly out-competed by other strains.  
Figure 10 shows two weaker strains (strains with lower growth rates) attempting to  
survive within a flock, even having a slight population peak at the optimal point of  
strain introduction, before eventually being forced to extinction by the other three  
strains. Parameter variation showed that reducing a strain's capabilities by a very small  
amount can allow it to persist still in the flock at a smaller average population than the  
others, but the majority of realisations would always end with weaker strains becoming  
extinct. Clearly this shows an environment where genetic dominance is very quickly  
selected for.

These results have considerable implications for biosecurity. While smaller flocks may  
have a very real opportunity to be protected from *Campylobacter* invasions, larger  
commercial flocks are seemingly an all-or-nothing affair. Efforts can be made to prevent



initial inoculations, but once a bacterial presence is established, it may be all but  
impossible to remove from a flock. Considerable improvements to biosecurity have been  
made in recent years, but very little impact has been observed in this having reduced  
*Campylobacter* incidence [13]. These measures do not reduce the speed of proliferation  
of the bacteria, and our results suggest that better attention to bird health is likely to  
have a greater effect on preventing flock infection.

This model's greatest strength is its lack of overarching assumptions. We model only  
the most basic bacterial interactions, all supported and verified through experimental  
work. Our stochastic system is capable of exhibiting a plethora of interesting dynamical  
interactions based on just a few known biological interactions. In moving forward with  
this work, the model can be used to theorise optimal methods by which to decrease the  
likelihood of *Campylobacter* outbreaks, and begin collaborative efforts in better  
explaining the evolving genetic diversity of this bacteria.

One area in which the model is admittedly lacking currently, is that it does not  
represent the physiological changes that occur as a bird grows. Broilers have been  
genetically selected over the many decades to grow excessively fast, which has been  
shown to have numerous concerning implications for their health [44]. This is likely to  
then result in differences to their auto-immune capabilities over time. More pertinently,  
the gut flora of a chicken is known to change and develop as the birds age [45],  
suggesting varying degrees of inter-bacterial uncertainty.

Our sensitivity analysis gives great insight into the optimal routes of infection  
prevention. Table 2 clearly shows that bolstering the growth rate and inhibition  
capabilities of the other bacteria populating a broiler's gut is the best way to force  
extinction of *Campylobacter*, primarily through suppressing *Campylobacter* at its initial  
appearance in a system, before it has the opportunity to propagate. As such, the  
sensitivity analysis suggests further exploration and experimentation into the impact of  
factors which would affect the gut flora of a broiler. Probiotics are a clear way of  
impacting the microflora [46] and have shown some effect in studies into their impact on  
*Campylobacter* expression [47]. Equally, the stressors linked with stocking density have  
been shown to affect the gut microflora by Guardia et al. (2011) [48]. Burkholder et al.

(2008) [49] have shown that feed withdrawal and heat stress can considerably alter and 551  
limit the gut microflora. These highlight that general bird health and welfare can be 552  
equally strong factors in determining the values of  $r_2$ ,  $d_2$  and  $\beta_C$ ; the parameters 553  
highlight as most “important” by the sensitivity analysis. Table 2 also however 554  
highlights the importance of parameters  $\xi$  and  $d_3$ , the growth and death rate of host 555  
defence peptides respectively. These parameters have been shown to be strongly 556  
affected by stressors such as overcrowding [50]. As such, this result would lend further 557  
support to giving greater care to the health and welfare of broilers, as the resulting 558  
improvement to host defence peptide production would have a positive impact on 559  
helping prevent *Campylobacter* outbreaks. 560

561  
These caveats notwithstanding, the model presented is capable of mechanistically 562  
explaining a wealth of experimentally observed *Campylobacter* population dynamics, 563  
further elucidating an urgent public health risk. We have used our framework to 564  
investigate multiple strain interactions, to understand better the spread of genotypes 565  
across a flock. Finally, we were able to use the model to highlight the factors most 566  
responsible for causing outbreaks of infection. Looking forward, this work can be used 567  
to understand better observed differences in outbreak dynamics between different farms 568  
and indeed countries, and further our goal of minimising public exposure to this 569  
dangerous pathogen. 570

## References

1. Ghareeb K, Awad W, Mohnl M, Schatzmayr G, Boehm J. Control strategies for *Campylobacter* infection in poultry production. *World's Poultry Science Journal*. 2013;69(1):57–76.
2. Nauta M, Jacobs-Reitsma WF, Evers EG, Van Pelt W, Havelaar AH. Risk assessment of *Campylobacter* in the Netherlands via broiler meat and other routes. RIVM Rapport 250911006. 2005;.
3. EFSA Panel on Biological Hazards (BIOHAZ). Scientific Opinion on *Campylobacter* in broiler meat production: control options and performance

- objectives and/or targets at different stages of the food chain. *EFSA Journal*. 2011;9(4):2105.
4. Jorgensen F, Madden RH, Arnold E, Charlett A, Elviss NC. FSA Project FS241044 - Survey report - A Microbiological survey of *Campylobacter* contamination in fresh whole UK produced chilled chickens at retail sale (2014-15); 2015. Available from: <https://www.food.gov.uk/sites/default/files/media/document/Final%20Report%20for%20FS241044%20Campylobacter%20Retail%20survey.pdf>.
  5. Strachan NJ, Forbes KJ. The growing UK epidemic of human campylobacteriosis. *The Lancet*. 2010;376(9742):665–667.
  6. McCarthy N, Giesecke J. Incidence of Guillain-Barré syndrome following infection with *Campylobacter jejuni*. *American Journal of Epidemiology*. 2001;153(6):610–614.
  7. Evans S, Sayers A. A longitudinal study of *Campylobacter* infection of broiler flocks in Great Britain. *Preventive Veterinary Medicine*. 2000;46(3):209–223.
  8. Stern NJ, Cox NA, Musgrove MT, Park C. Incidence and levels of *Campylobacter* in broilers after exposure to an inoculated seeder bird. *Journal of Applied Poultry Research*. 2001;10(4):315–318.
  9. Shanker S, Lee A, Sorrell T. Horizontal transmission of *Campylobacter jejuni* amongst broiler chicks: experimental studies. *Epidemiology & Infection*. 1990;104(1):101–110.
  10. Adkin A, Hartnett E, Jordan L, Newell D, Davison H. Use of a systematic review to assist the development of *Campylobacter* control strategies in broilers. *Journal of Applied Microbiology*. 2006;100(2):306–315.
  11. Newell DG, Wagenaar JA. Poultry infections and their control at the farm level. *Campylobacter*, 2nd ed. Washington D.C.: ASM Press; 2000.
  12. Sahin O, Zhang Q, Meitzler JC, Harr BS, Morishita TY, Mohan R. Prevalence, antigenic specificity, and bactericidal activity of poultry anti-*Campylobacter*

- maternal antibodies. *Applied and Environmental Microbiology*. 2001;67(9):3951–3957.
13. Hermans D, Van Deun K, Messens W, Martel A, Van Immerseel F, Haesebrouck F, et al. Campylobacter control in poultry by current intervention measures ineffective: urgent need for intensified fundamental research. *Veterinary Microbiology*. 2011;152(3-4):219–228.
  14. Tresse O, Alvarez-Ordóñez A, Connerton IF. About the Foodborne Pathogen Campylobacter. *Frontiers in Microbiology*. 2017;8:1908.
  15. Khachatourians GG. Agricultural use of antibiotics and the evolution and transfer of antibiotic-resistant bacteria. *Canadian Medical Association Journal*. 1998;159(9):1129–1136.
  16. Ge B, White DG, McDermott PF, Girard W, Zhao S, Hubert S, et al. Antimicrobial-resistant Campylobacter species from retail raw meats. *Applied and Environmental Microbiology*. 2003;69(5):3005–3007.
  17. Travers K, Michael B. Morbidity of infections caused by antimicrobial-resistant bacteria. *Clinical Infectious Diseases*. 2002;34(Supplement\_3):S131–S134.
  18. Van Gerwe T, Bouma A, Jacobs-Reitsma W, Van den Broek J, Klinkenberg D, Stegeman J, et al. Quantifying transmission of Campylobacter spp. among broilers. *Applied and Environmental Microbiology*. 2005;71(10):5765–5770.
  19. Hartnett E, Kelly L, Newell D, Wooldridge M, Gettinby G. A quantitative risk assessment for the occurrence of Campylobacter in chickens at the point of slaughter. *Epidemiology & Infection*. 2001;127(2):195–206.
  20. Pan D, Yu Z. Intestinal microbiome of poultry and its interaction with host and diet. *Gut Microbes*. 2014;5(1):108–119.
  21. Wiles TJ, Jemielita M, Baker RP, Schlomann BH, Logan SL, Ganz J, et al. Host gut motility promotes competitive exclusion within a model intestinal microbiota. *PLoS Biology*. 2016;14(7):e1002517.

22. Stahl M, Butcher J, Stintzi A. Nutrient acquisition and metabolism by *Campylobacter jejuni*. *Frontiers in Cellular and Infection Microbiology*. 2012;2:5.
23. Giolda LM, DiRita VJ. Zinc competition among the intestinal microbiota. *MBio*. 2012;3(4):e00171–12.
24. Raines DJ, Moroz OV, Blagova EV, Turkenburg JP, Wilson KS, Duhme-Klair AK. Bacteria in an intense competition for iron: Key component of the *Campylobacter jejuni* iron uptake system scavenges enterobactin hydrolysis product. *Proceedings of the National Academy of Sciences*. 2016;113(21):5850–5855.
25. Cawthraw S, Ayling R, Nuijten P, Wassenaar T, Newell D. Isotype, specificity, and kinetics of systemic and mucosal antibodies to *Campylobacter jejuni* antigens, including flagellin, during experimental oral infections of chickens. *Avian Diseases*. 1994; p. 341–349.
26. Schoeni JL, Doyle MP. Reduction of *Campylobacter jejuni* colonization of chicks by cecum-colonizing bacteria producing anti-*C. jejuni* metabolites. *Applied and Environmental Microbiology*. 1992;58(2):664–670.
27. Sahin O, Kassem II, Shen Z, Lin J, Rajashekara G, Zhang Q. *Campylobacter* in poultry: ecology and potential interventions. *Avian Diseases*. 2015;59(2):185–200.
28. Welkos S. Experimental gastroenteritis in newly-hatched chicks infected with *Campylobacter jejuni*. *Journal of Medical Microbiology*. 1984;18(2):233–248.
29. Achen M, Morishita TY, Ley EC. Shedding and colonization of *Campylobacter jejuni* in broilers from day-of-hatch to slaughter age. *Avian Diseases*. 1998; p. 732–737.
30. Newell D, Fearnley C. Sources of *Campylobacter* colonization in broiler chickens. *Applied and Environmental Microbiology*. 2003;69(8):4343–4351.
31. Morishita TY, Aye PP, Harr BS, Cobb CW, Clifford JR. Evaluation of an avian-specific probiotic to reduce the colonization and shedding of *Campylobacter jejuni* in broilers. *Avian Diseases*. 1997; p. 850–855.

32. Stern N, Cox N, Bailey J, Berrang M, Musgrove M. Comparison of mucosal competitive exclusion and competitive exclusion treatment to reduce *Salmonella* and *Campylobacter* spp. colonization in broiler chickens. *Poultry Science*. 2001;80(2):156–160.
33. Higham DJ. An algorithmic introduction to numerical simulation of stochastic differential equations. *SIAM Review*. 2001;43(3):525–546.
34. Acke E, McGill K, Golden O, Jones B, Fanning S, Whyte P. A comparison of different culture methods for the recovery of *Campylobacter* species from pets. *Zoonoses and public health*. 2009;56(9-10):490–495.
35. Council of European Union. Council Directive 2007/43/EC of 28 June 2007 laying down minimum rules for the protection of chickens kept for meat production [2007] OJ L182/19; 2007.
36. Murphy C, Carroll C, Jordan K. Environmental survival mechanisms of the foodborne pathogen *Campylobacter jejuni*. *Journal of Applied Microbiology*. 2006;100(4):623–632.
37. Park SF. The physiology of *Campylobacter* species and its relevance to their role as foodborne pathogens. *International Journal of Food Microbiology*. 2002;74(3):177–188.
38. Saltelli A, Ratto M, Andres T, Campolongo F, Cariboni J, Gatelli D, et al. *Global sensitivity analysis: the primer*. John Wiley & Sons; 2008.
39. Connerton PL, Richards PJ, Lafontaine GM, O’Kane PM, Ghaffar N, Cummings NJ, et al. The effect of the timing of exposure to *Campylobacter jejuni* on the gut microbiome and inflammatory responses of broiler chickens. *Microbiome*. 2018;6(1):88.
40. Stern N, Clavero M, Bailey J, Cox N, Robach M. *Campylobacter* spp. in broilers on the farm and after transport. *Poultry Science*. 1995;74(6):937–941.
41. Colles FM, McCarthy ND, Layton R, Maiden MC. The prevalence of *Campylobacter* amongst a free-range broiler breeder flock was primarily affected by flock age. *PLoS One*. 2011;6(12):e22825.

42. Colles FM, Maiden MC. Exploring the population dynamics of multiple *Campylobacter* strains in poultry. *Campylobacter Ecology and Evolution*. 2014; p. 213.
43. Colles FM, McCarthy ND, Bliss CM, Layton R, Maiden MC. The long-term dynamics of *Campylobacter* colonizing a free-range broiler breeder flock: an observational study. *Environmental Microbiology*. 2015;17(4):938–946.
44. Buzala M, Janicki B, Czarnecki R. Consequences of different growth rates in broiler breeder and layer hens on embryogenesis, metabolism and metabolic rate: a review. *Poultry Science*. 2015;94(4):728–733.
45. Lu J, Idris U, Harmon B, Hofacre C, Maurer JJ, Lee MD. Diversity and succession of the intestinal bacterial community of the maturing broiler chicken. *Applied and Environmental Microbiology*. 2003;69(11):6816–6824.
46. Mountzouris K, Tsirtsikos P, Kalamara E, Nitsch S, Schatzmayr G, Fegeros K. Evaluation of the efficacy of a probiotic containing *Lactobacillus*, *Bifidobacterium*, *Enterococcus*, and *Pediococcus* strains in promoting broiler performance and modulating cecal microflora composition and metabolic activities. *Poultry Science*. 2007;86(2):309–317.
47. Santini C, Baffoni L, Gaggia F, Granata M, Gasbarri R, Di Gioia D, et al. Characterization of probiotic strains: an application as feed additives in poultry against *Campylobacter jejuni*. *International Journal of Food Microbiology*. 2010;141:S98–S108.
48. Guardia S, Konsak B, Combes S, Levenez F, Cauquil L, Guillot JF, et al. Effects of stocking density on the growth performance and digestive microbiota of broiler chickens. *Poultry Science*. 2011;90(9):1878–1889.
49. Burkholder K, Thompson K, Einstein M, Applegate T, Patterson J. Influence of stressors on normal intestinal microbiota, intestinal morphology, and susceptibility to *Salmonella enteritidis* colonization in broilers. *Poultry Science*. 2008;87(9):1734–1741.

50. Gomes A, Quinteiro-Filho WM, Ribeiro A, Ferraz-de Paula V, Pinheiro M, Baskeville E, et al. Overcrowding stress decreases macrophage activity and increases Salmonella enteritidis invasion in broiler chickens. *Avian Pathology*. 2014;43(1):82–90.



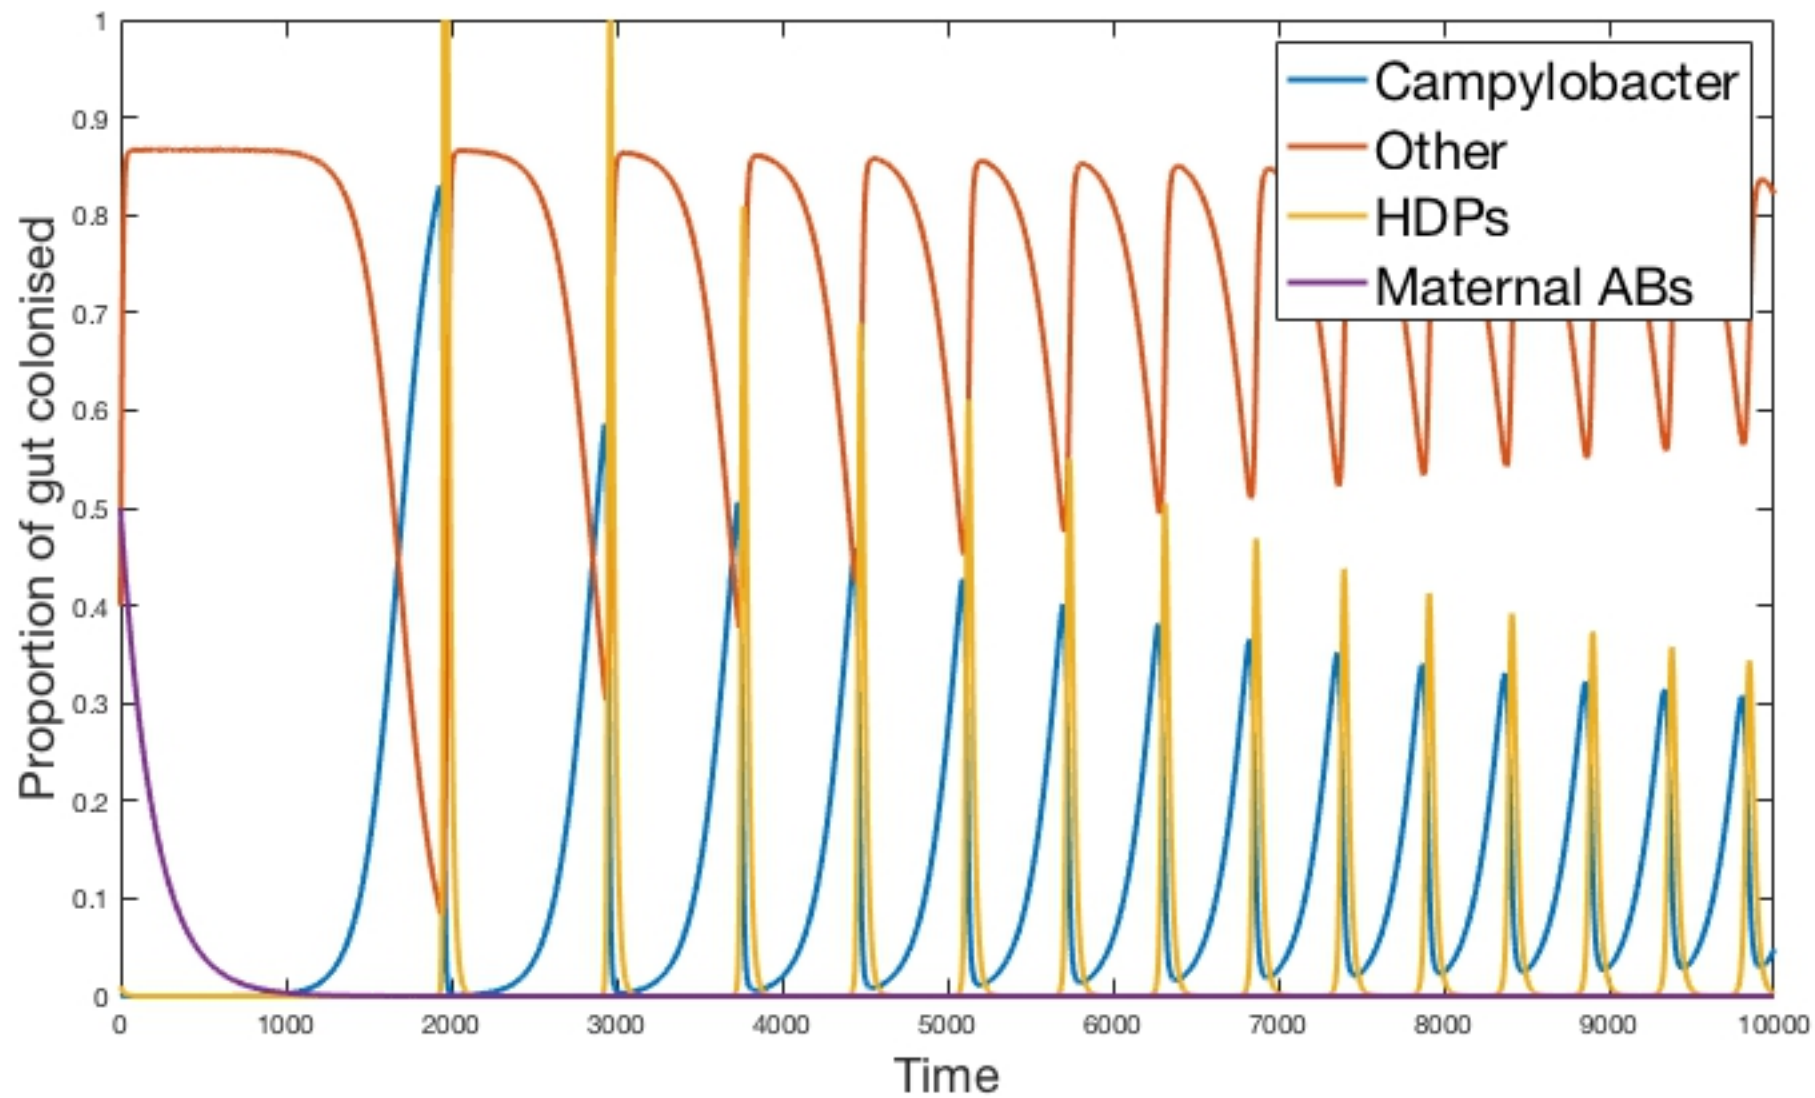

Figure 1

Percentage of broilers shedding *Campylobacter* over time.

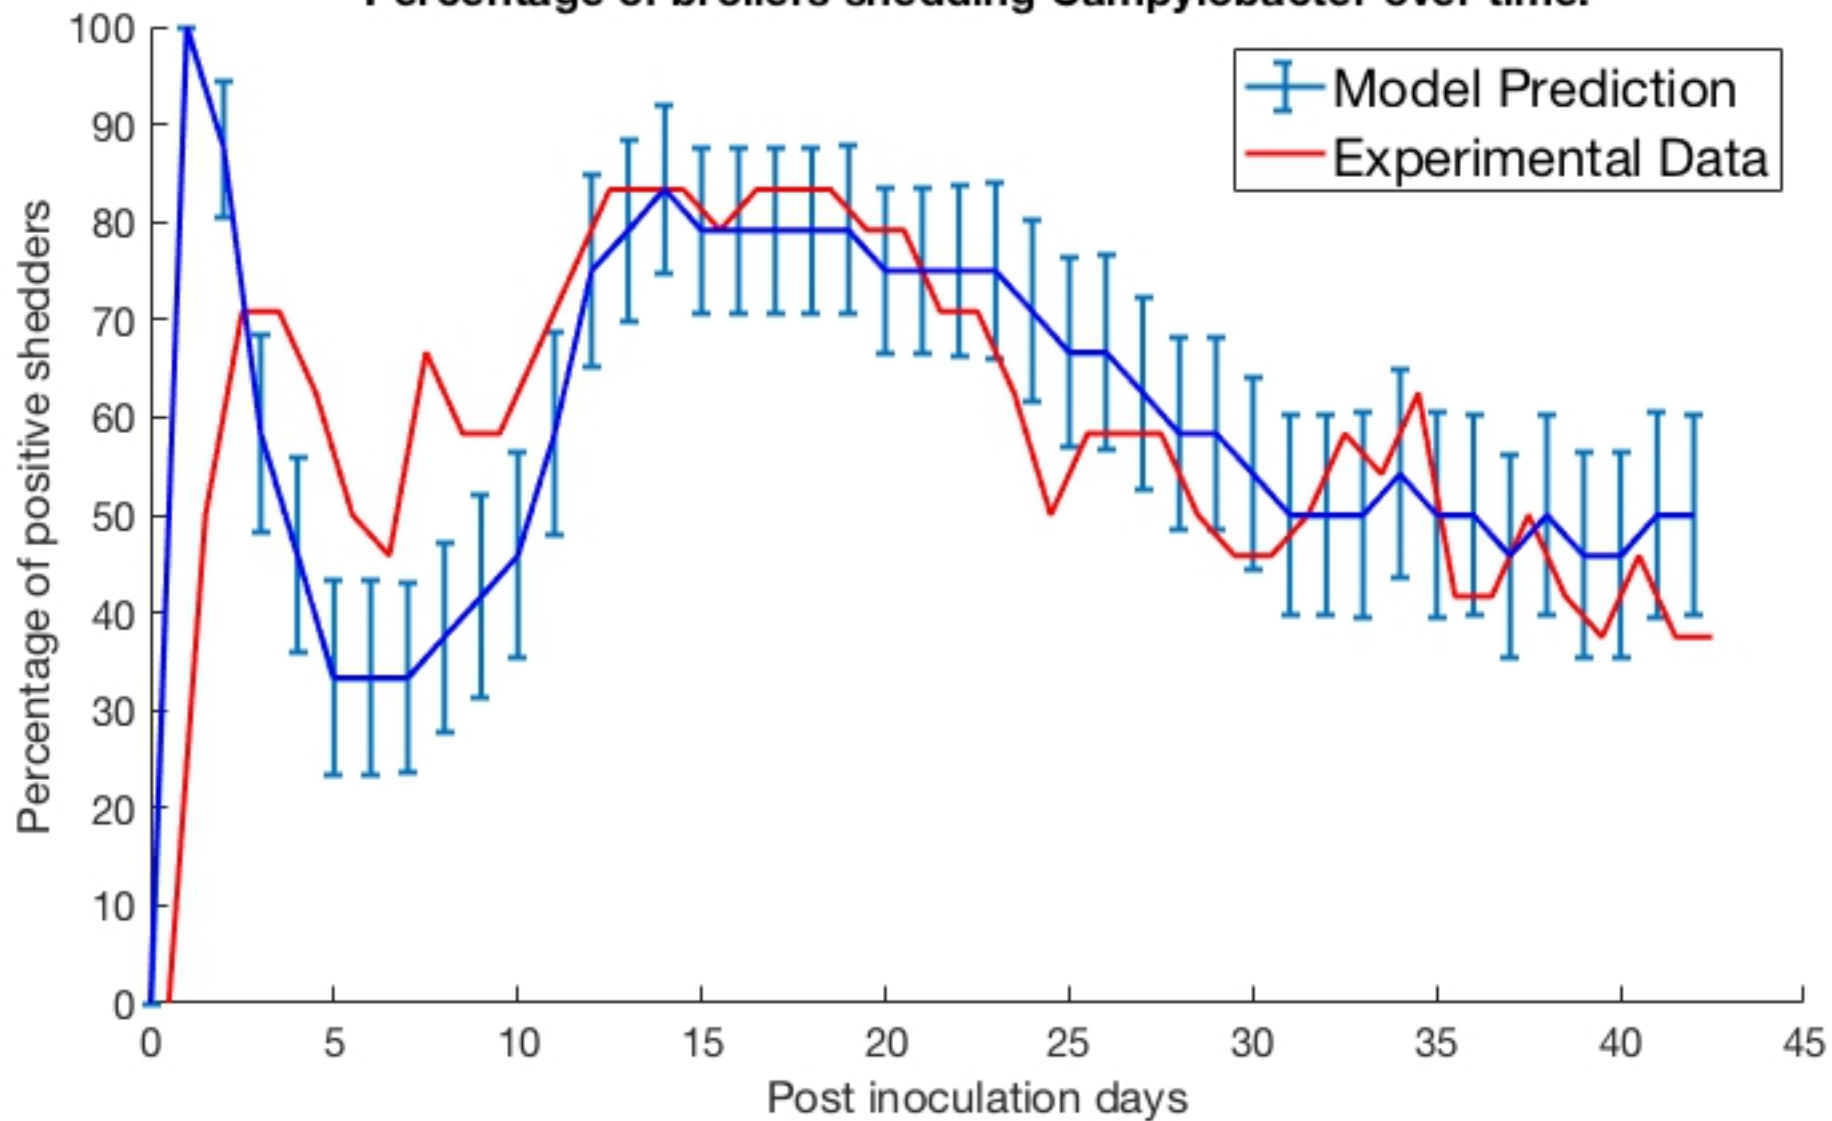

Figure 2

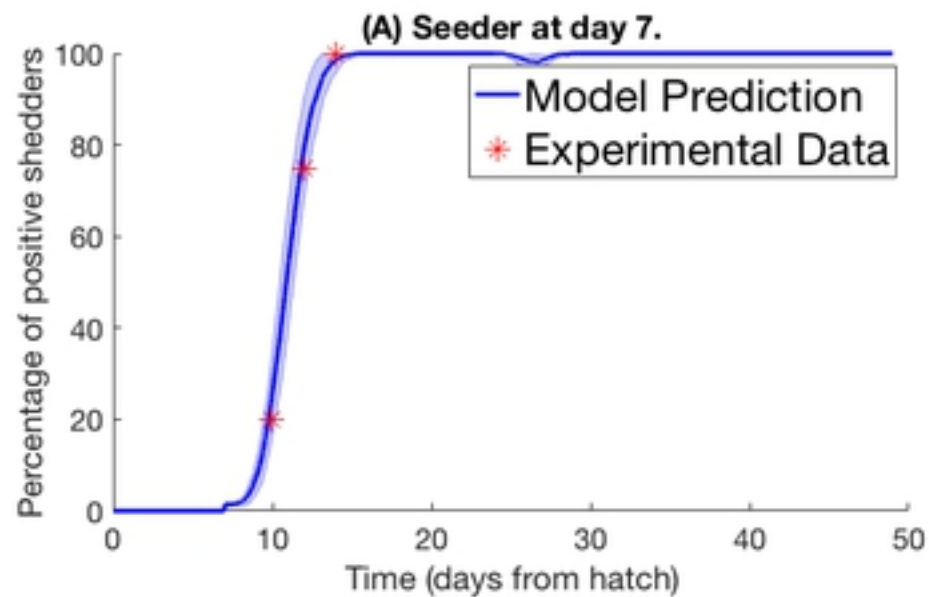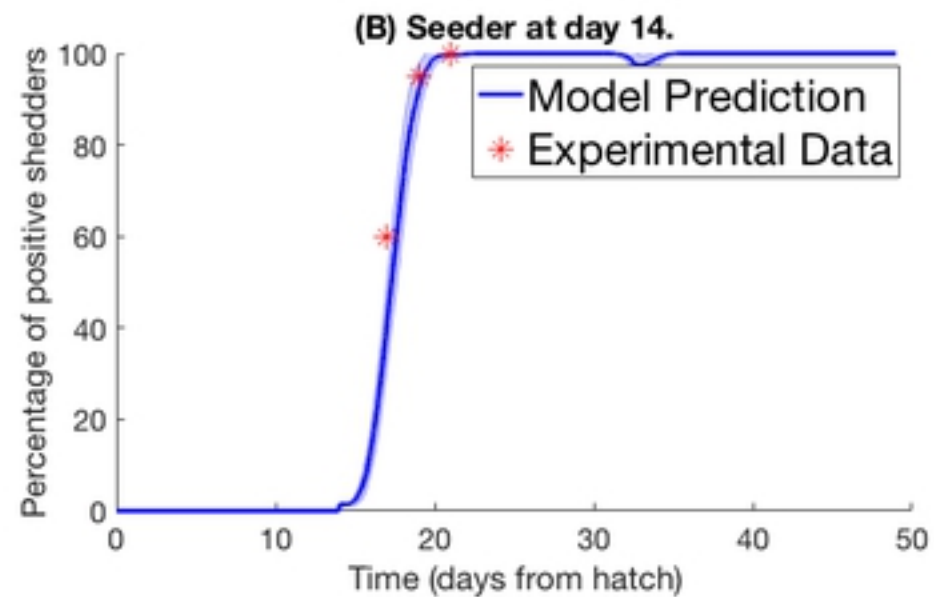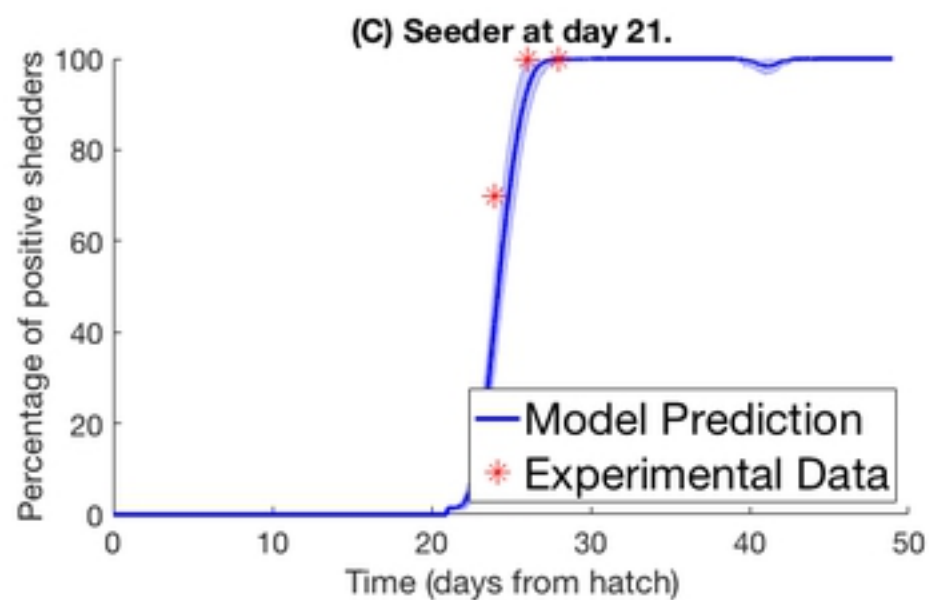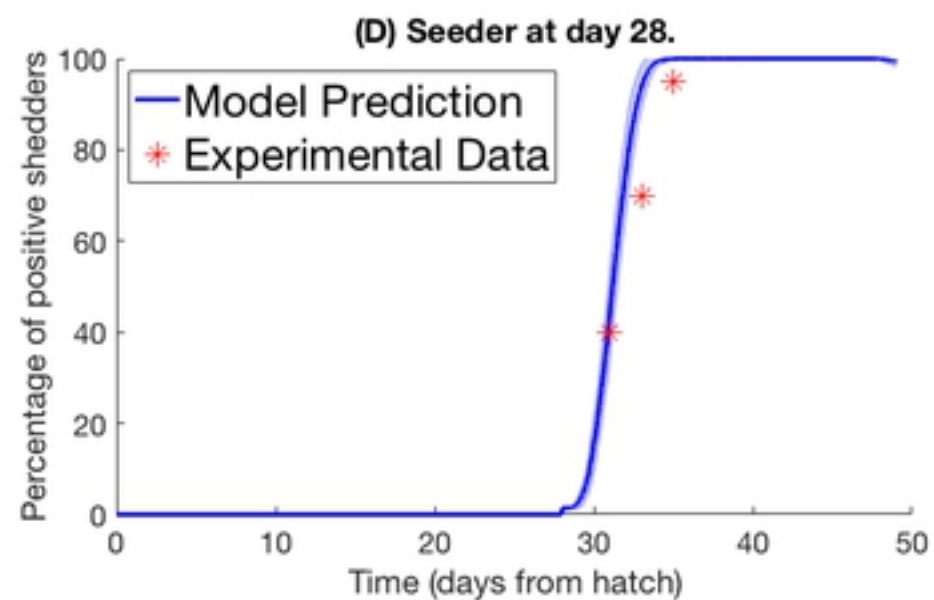

Figure 3

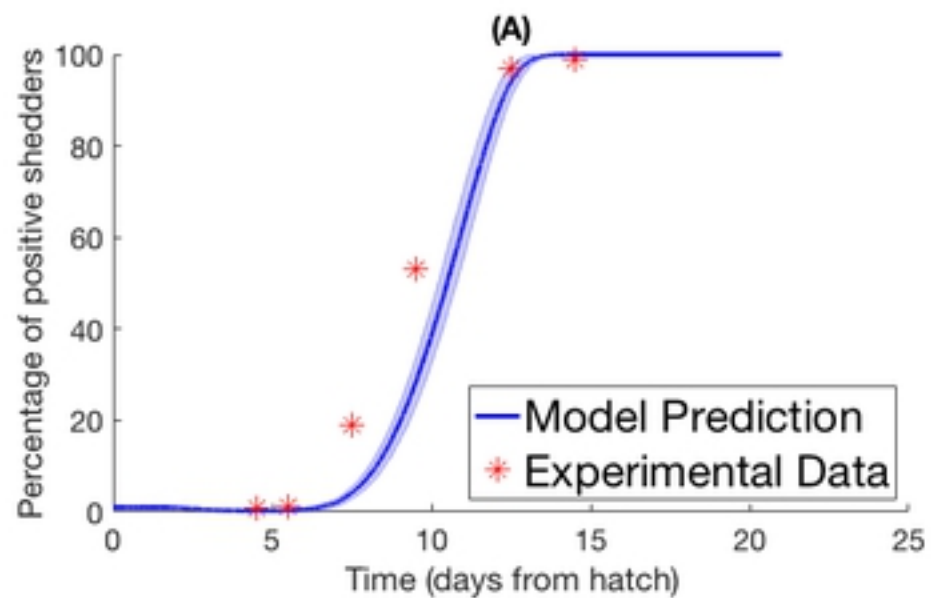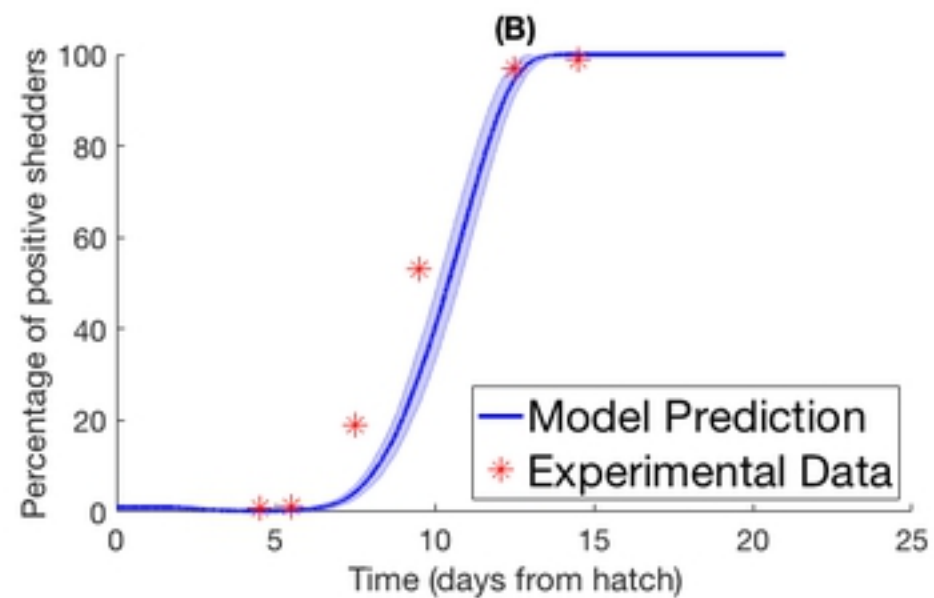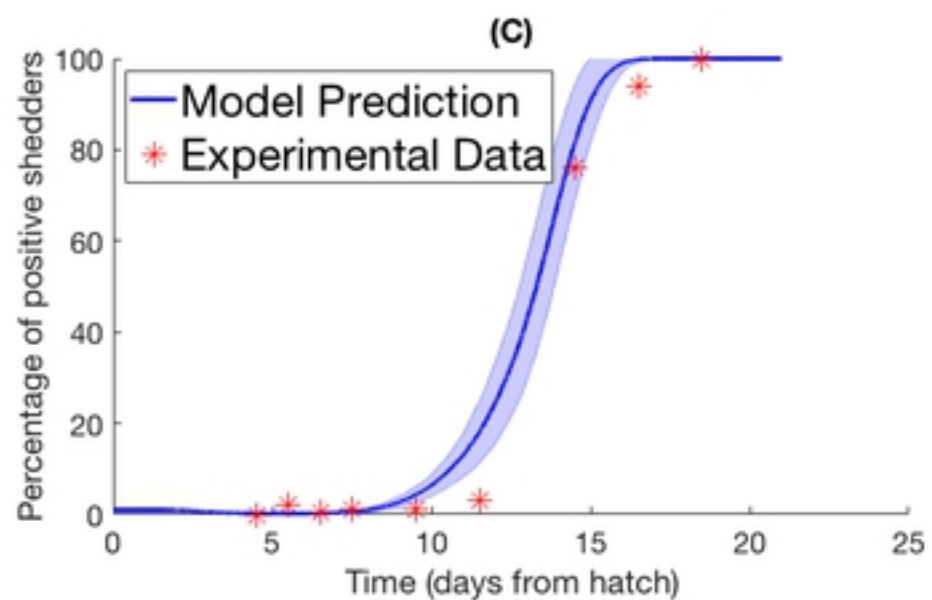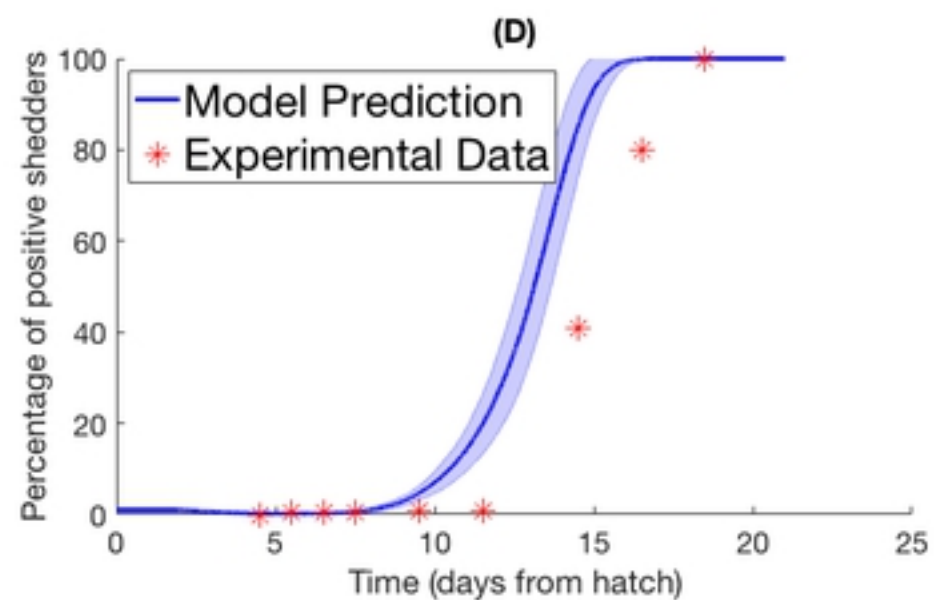

Figure 4

### (A) Gut Flora in Chicken - Strains All Introduced at t=0

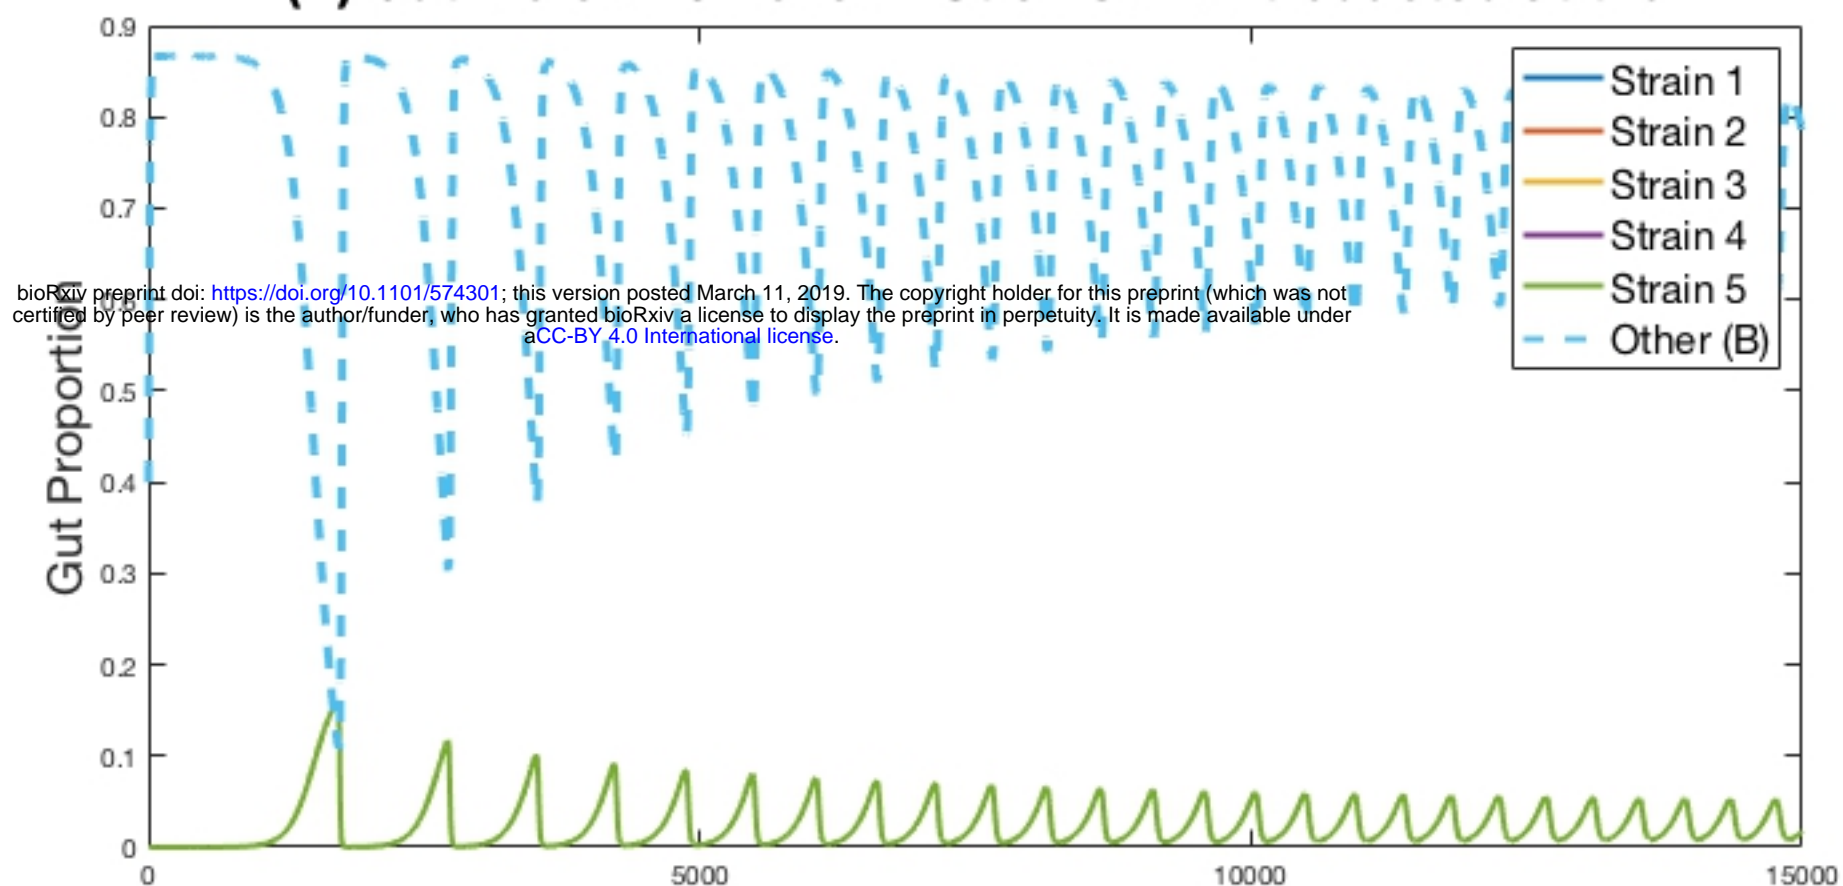

### (B) Gut Flora in Chicken - Strains Introduced in Intervals of t = 250

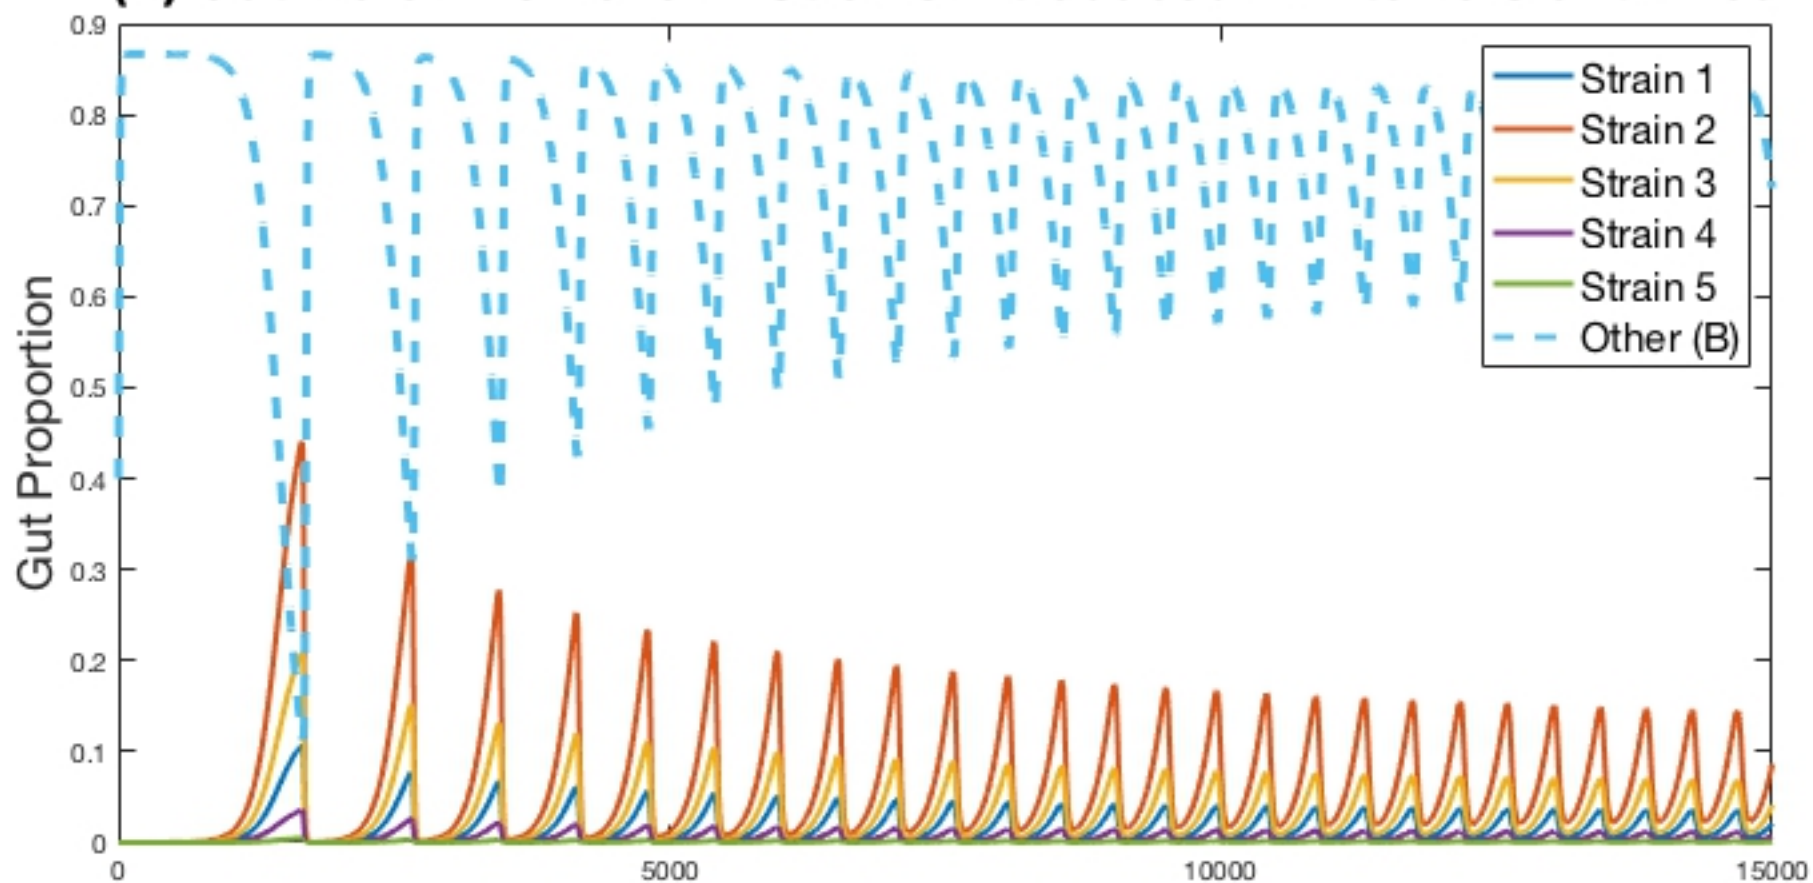

Figure 5



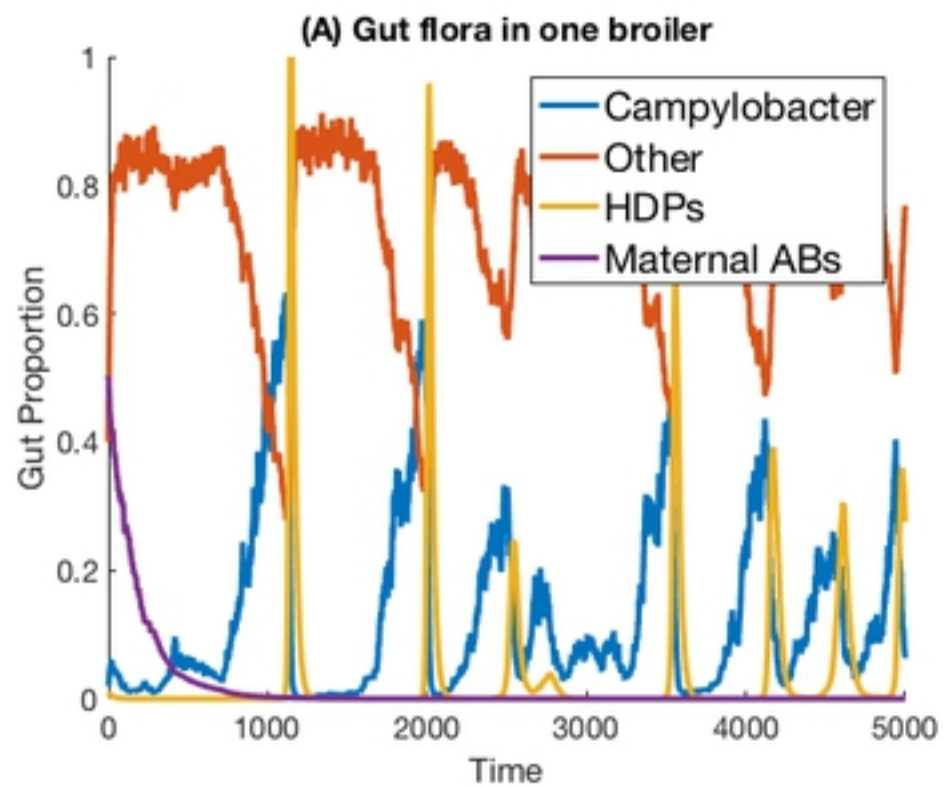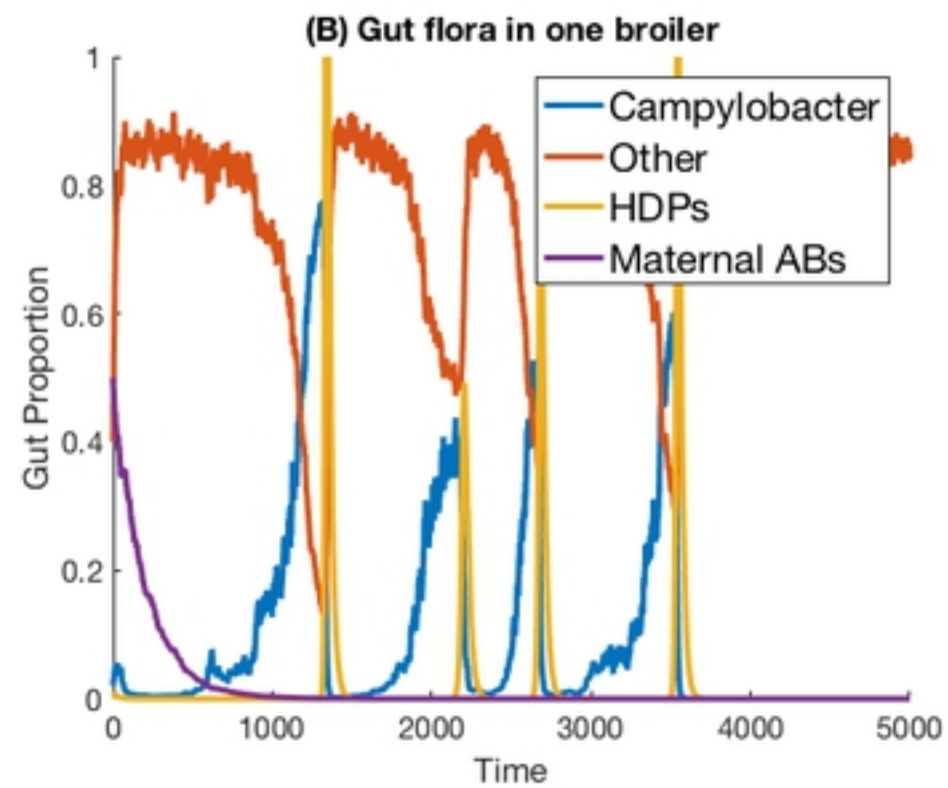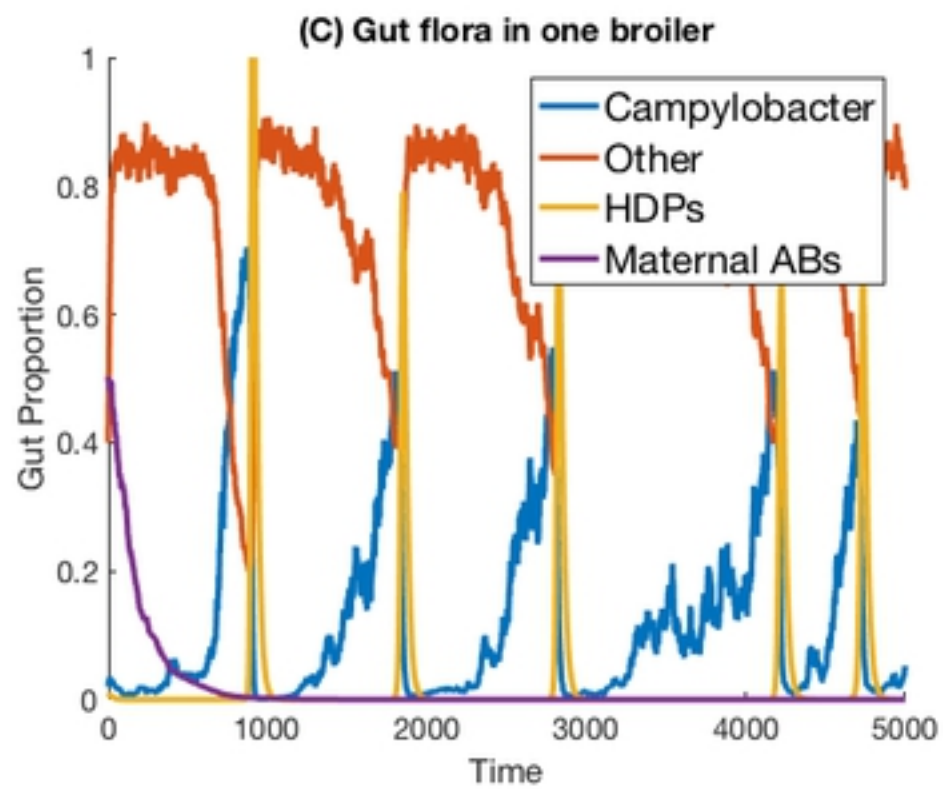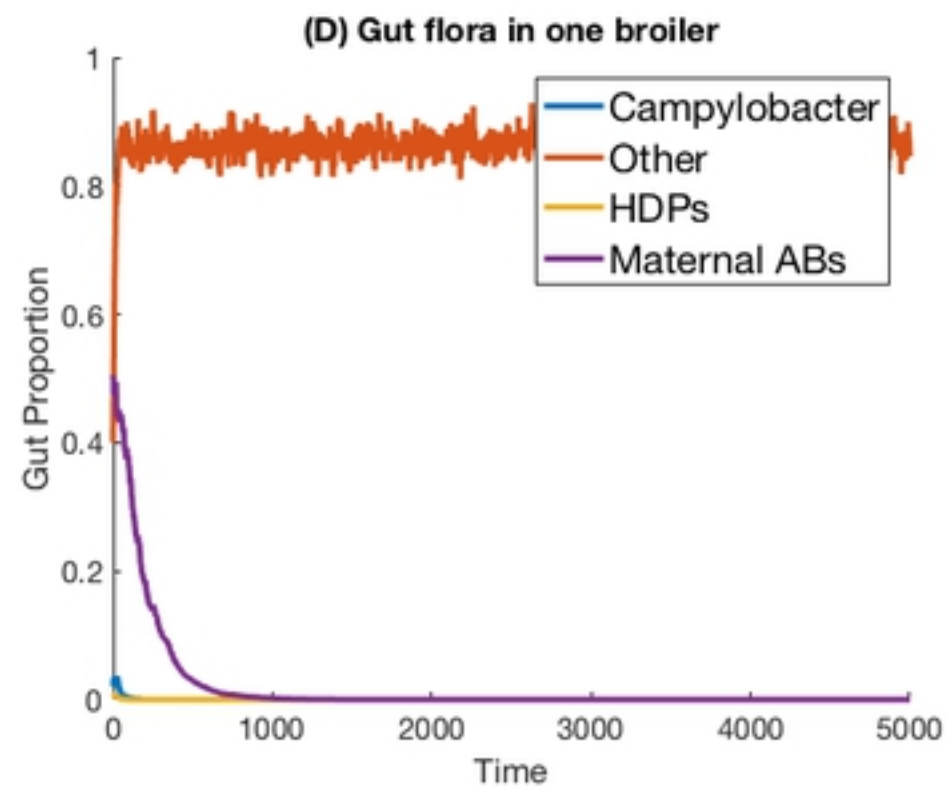

Figure 6

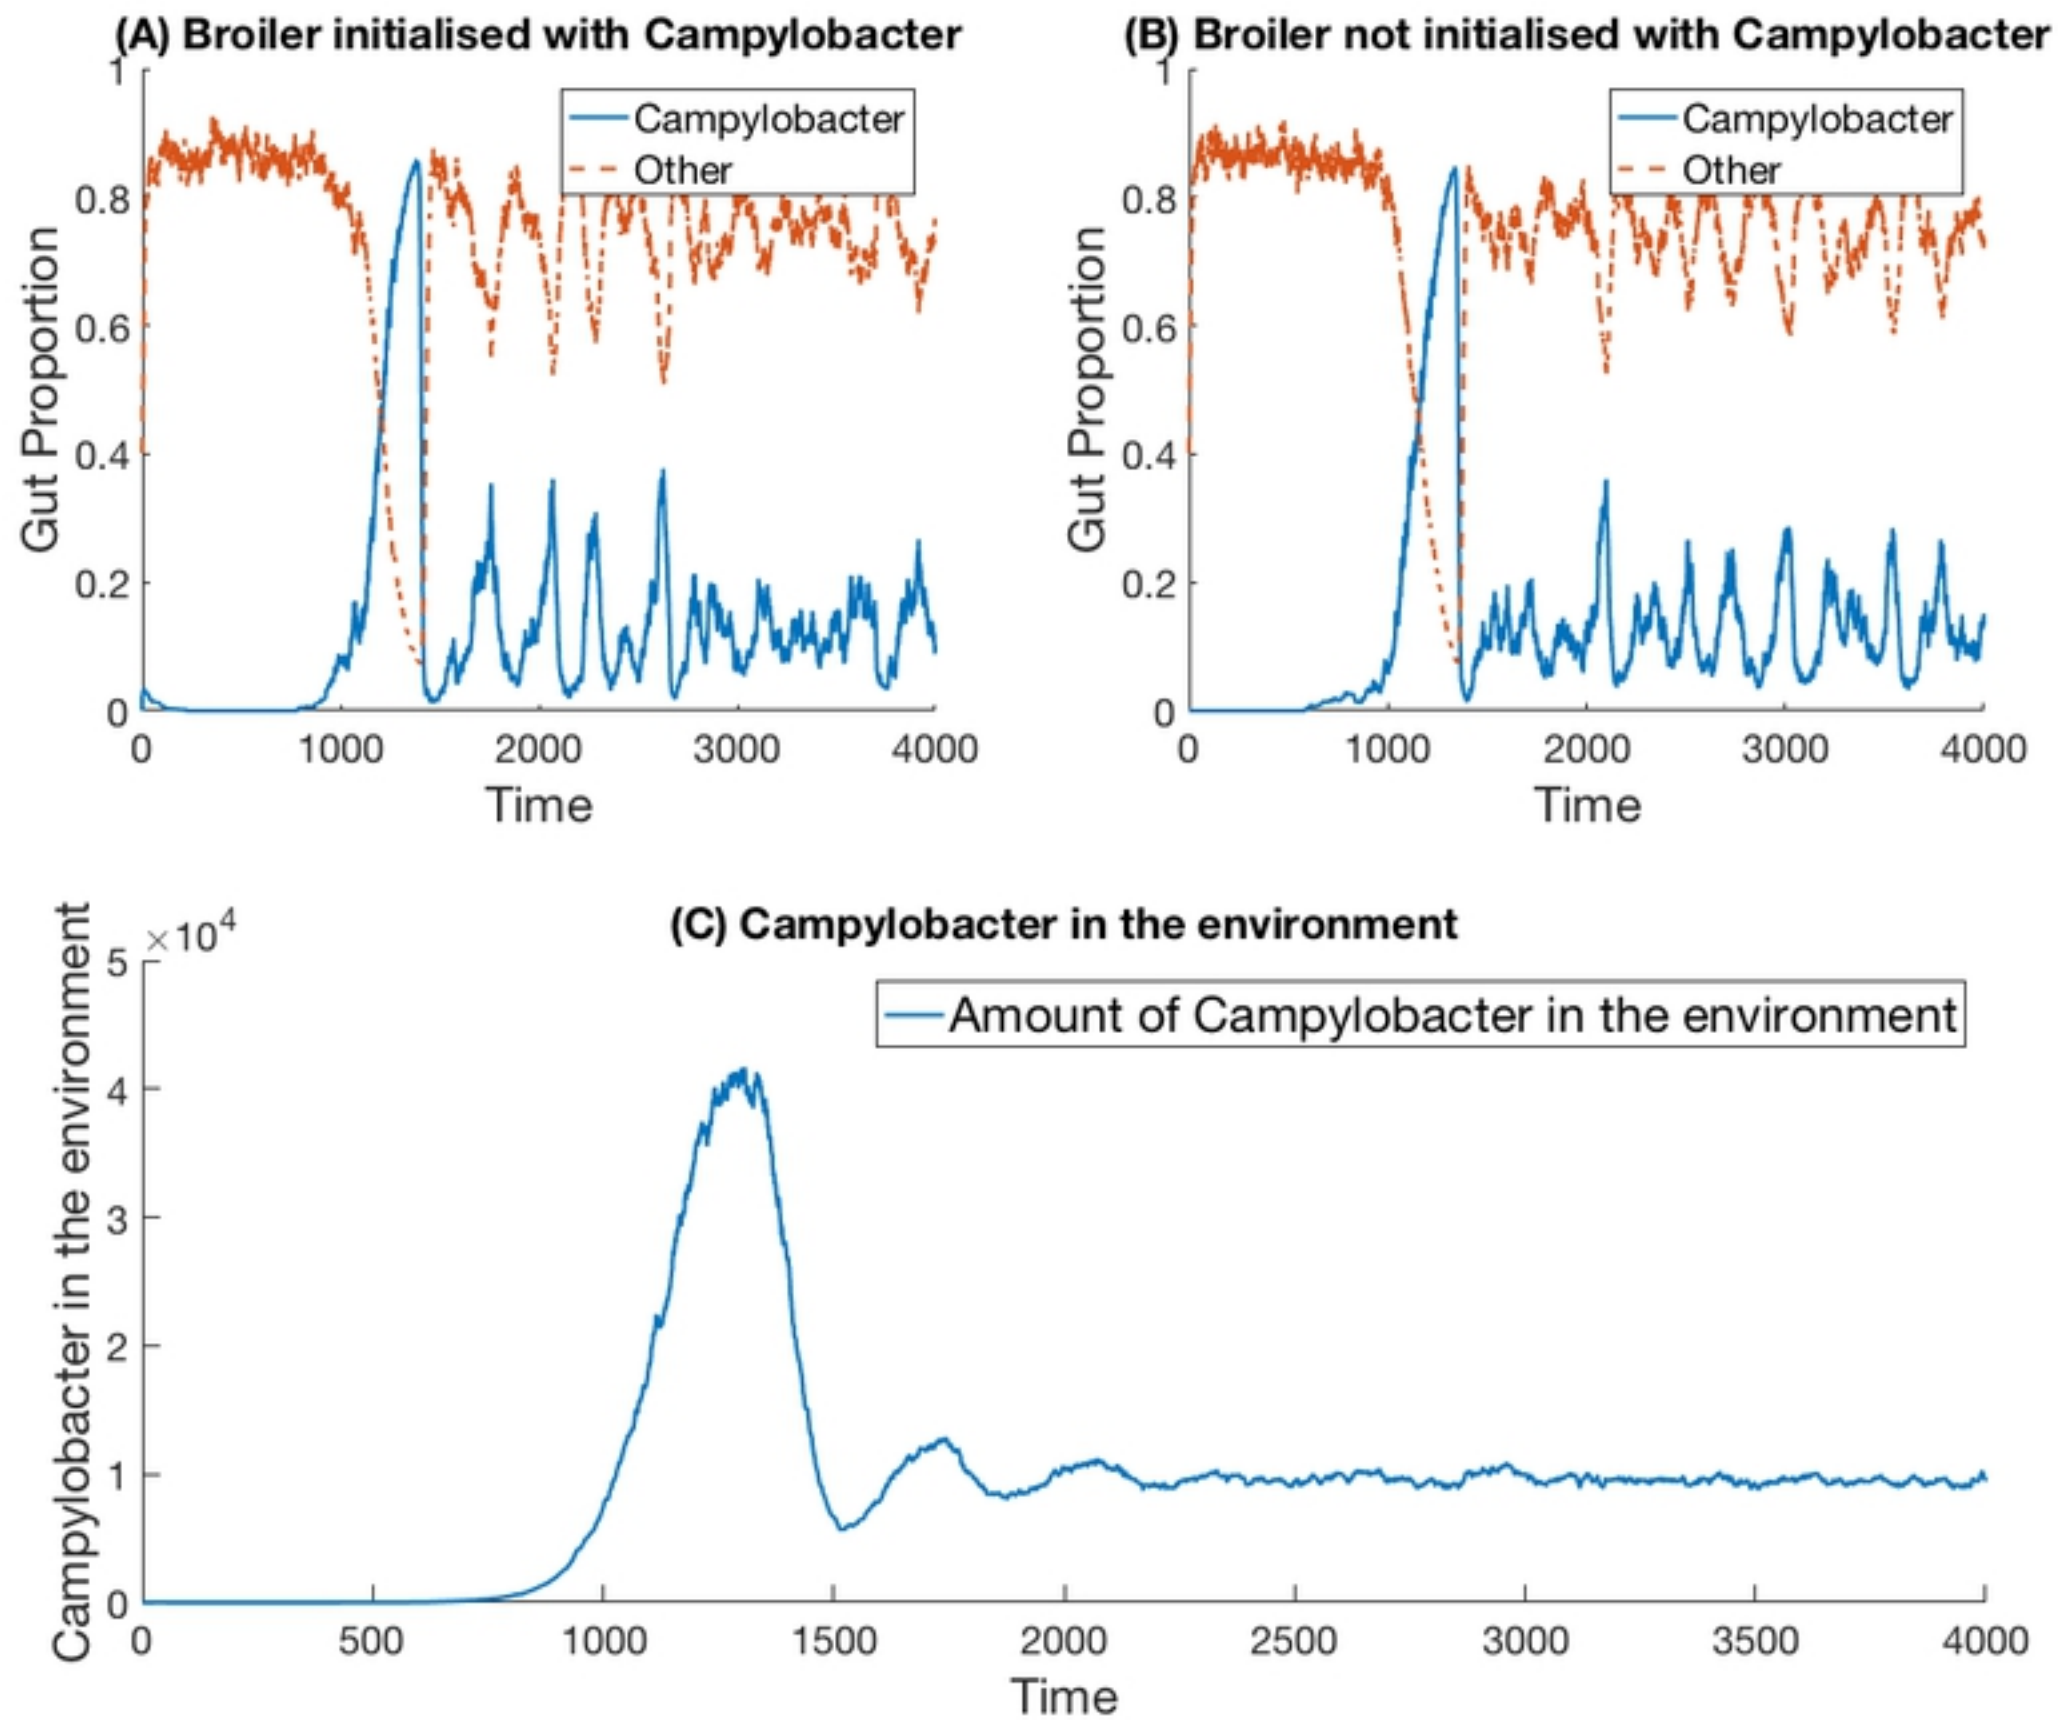

Figure 7

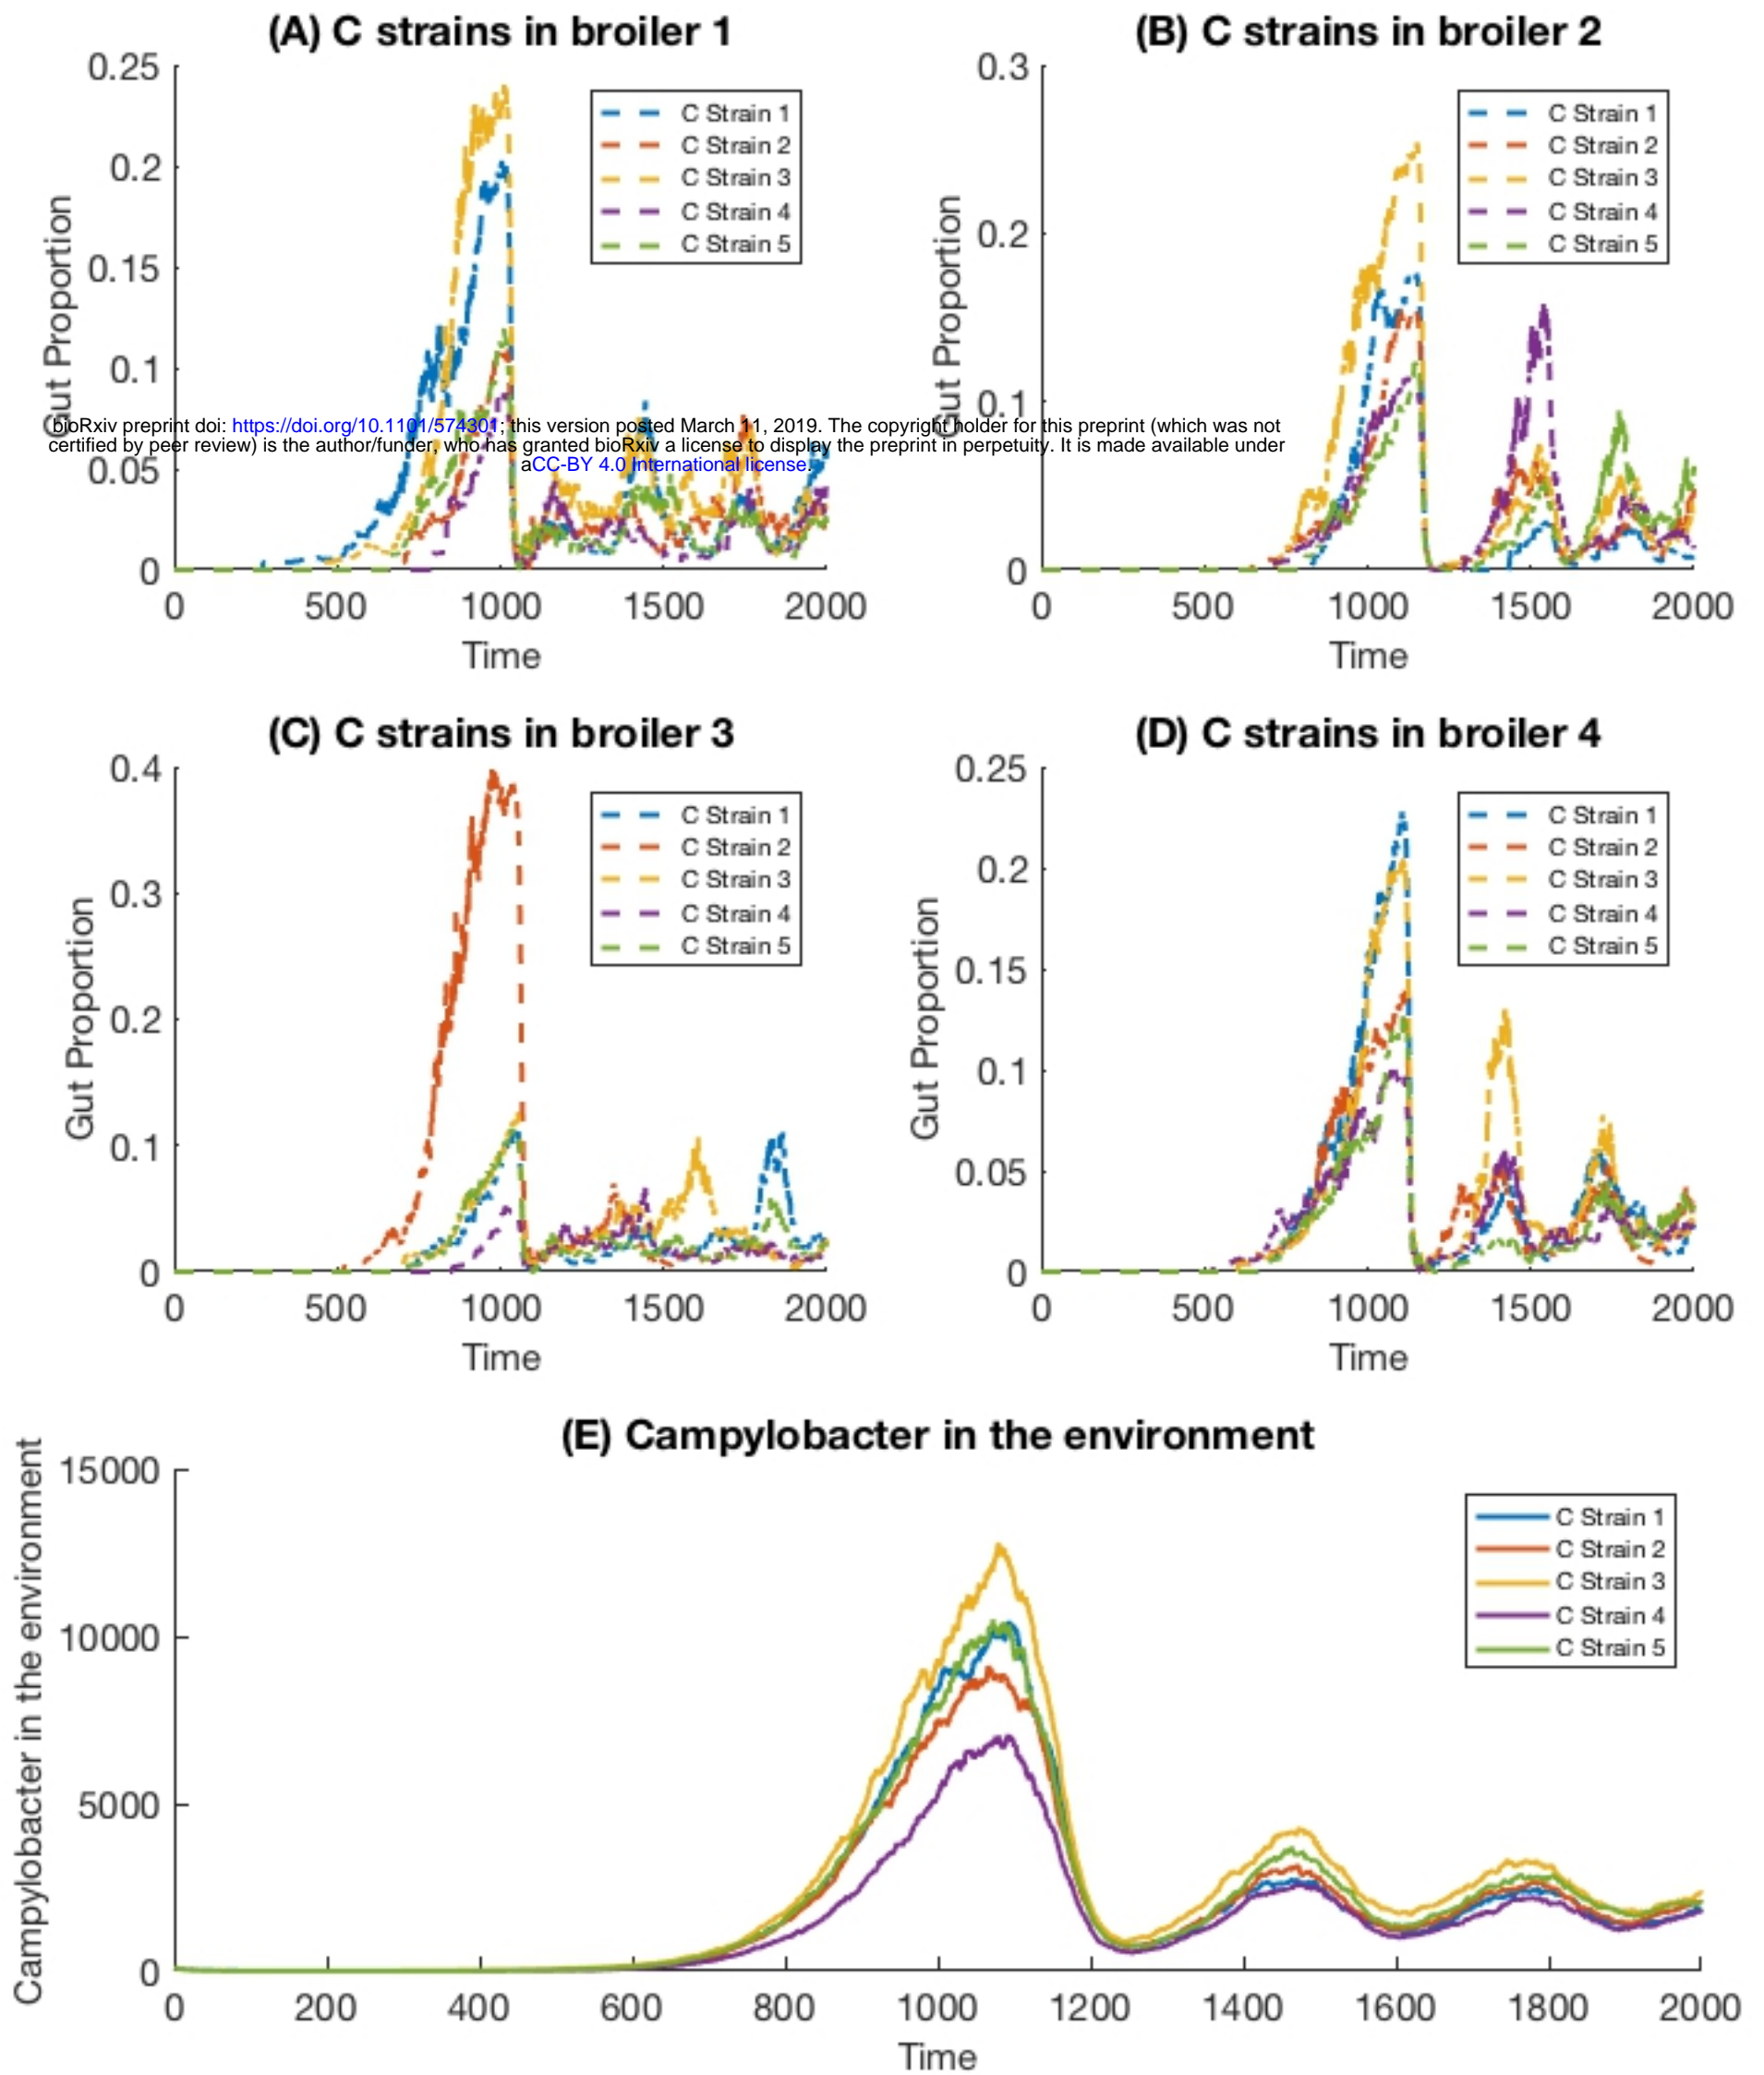

Figure 8



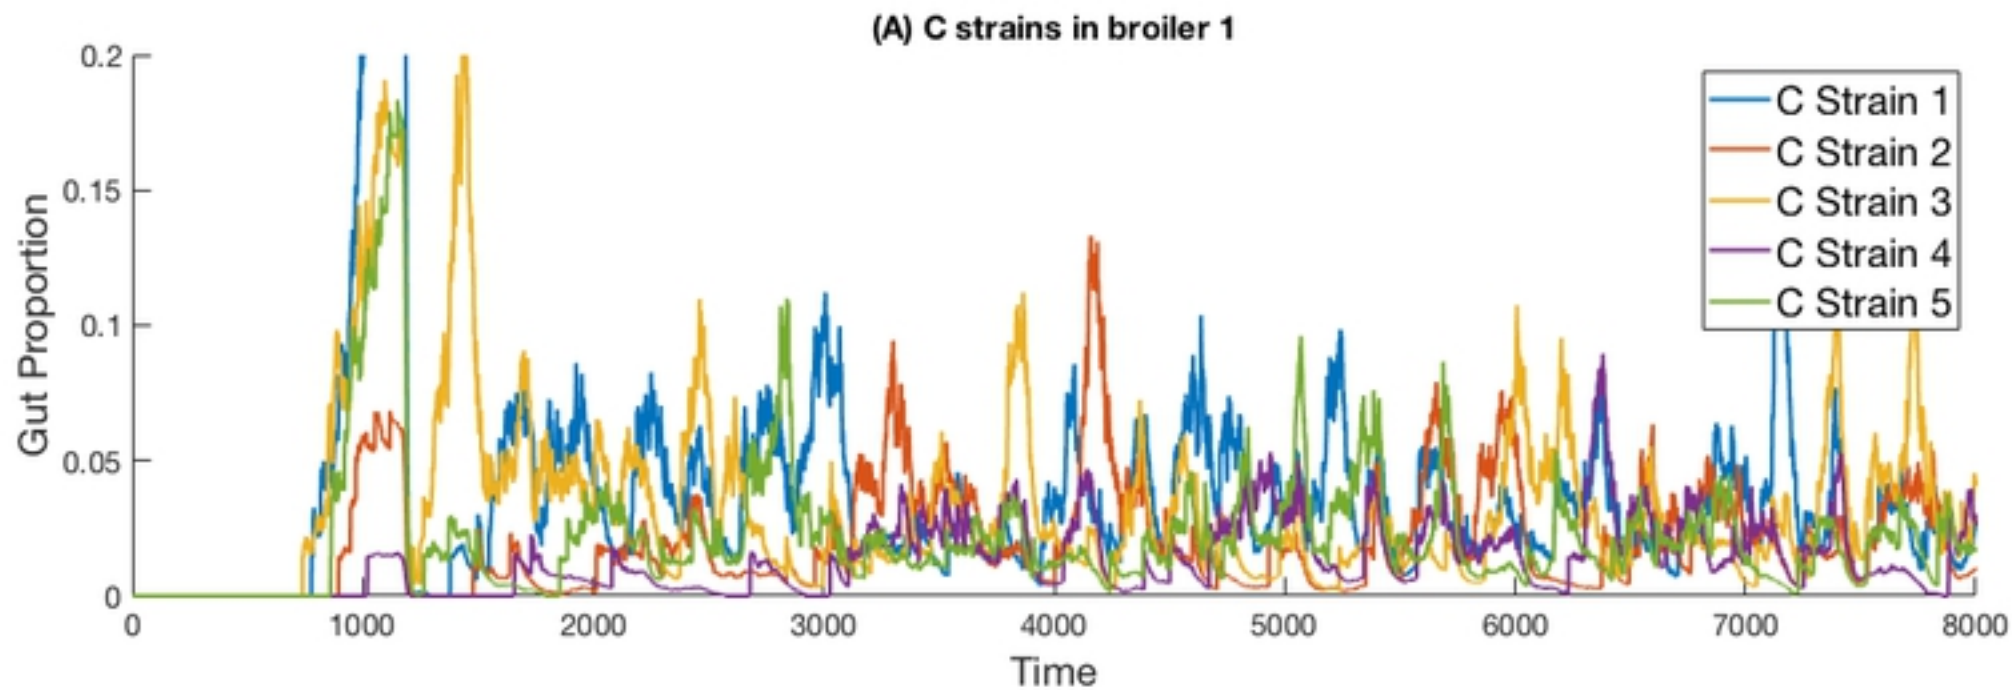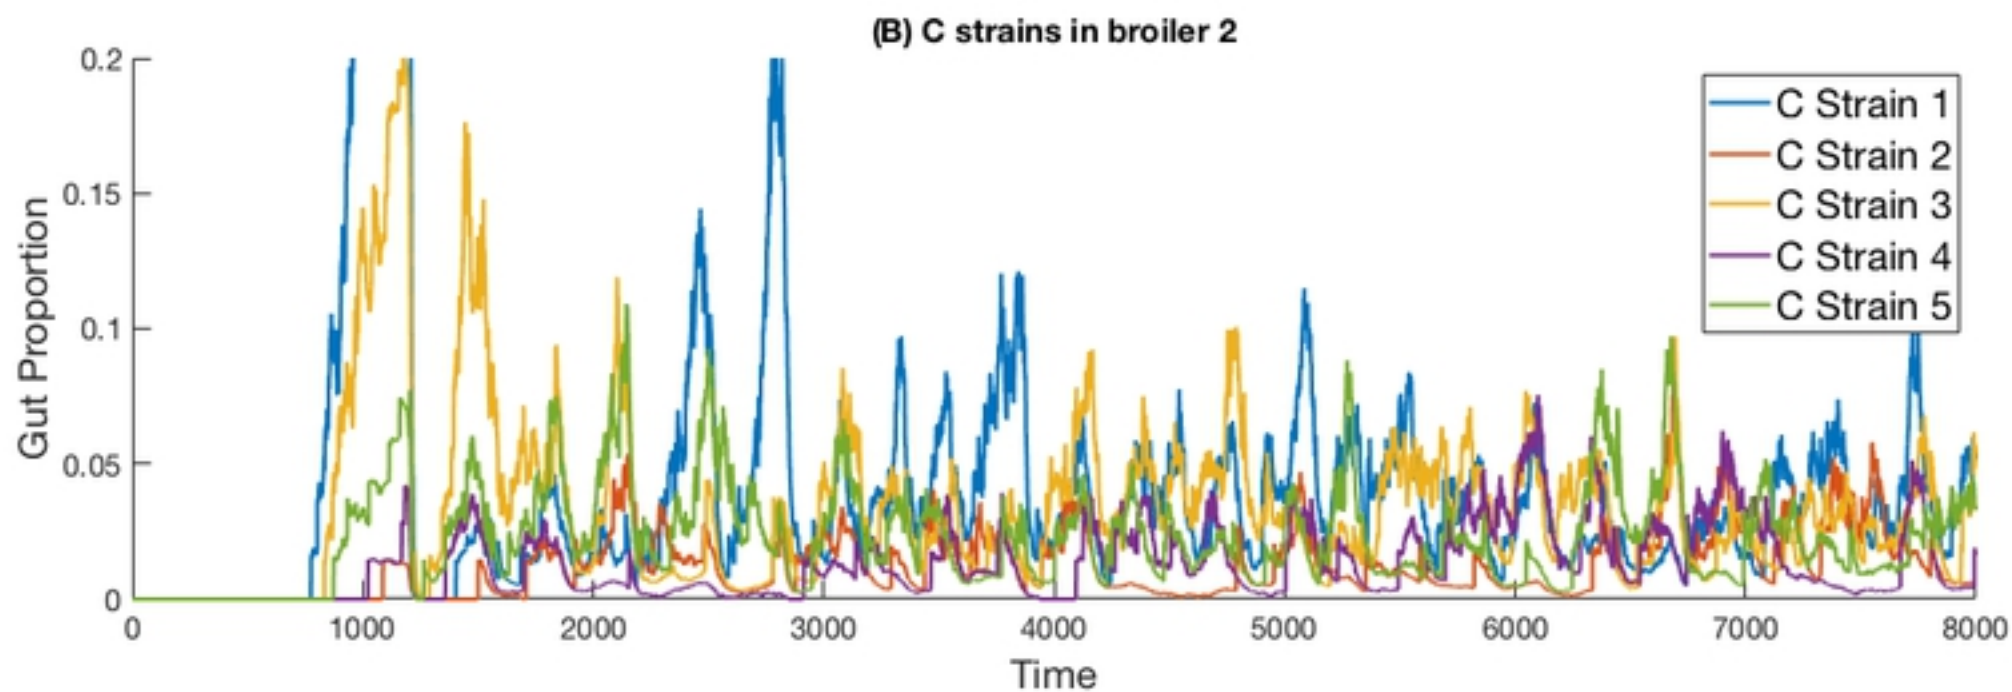

Figure 9

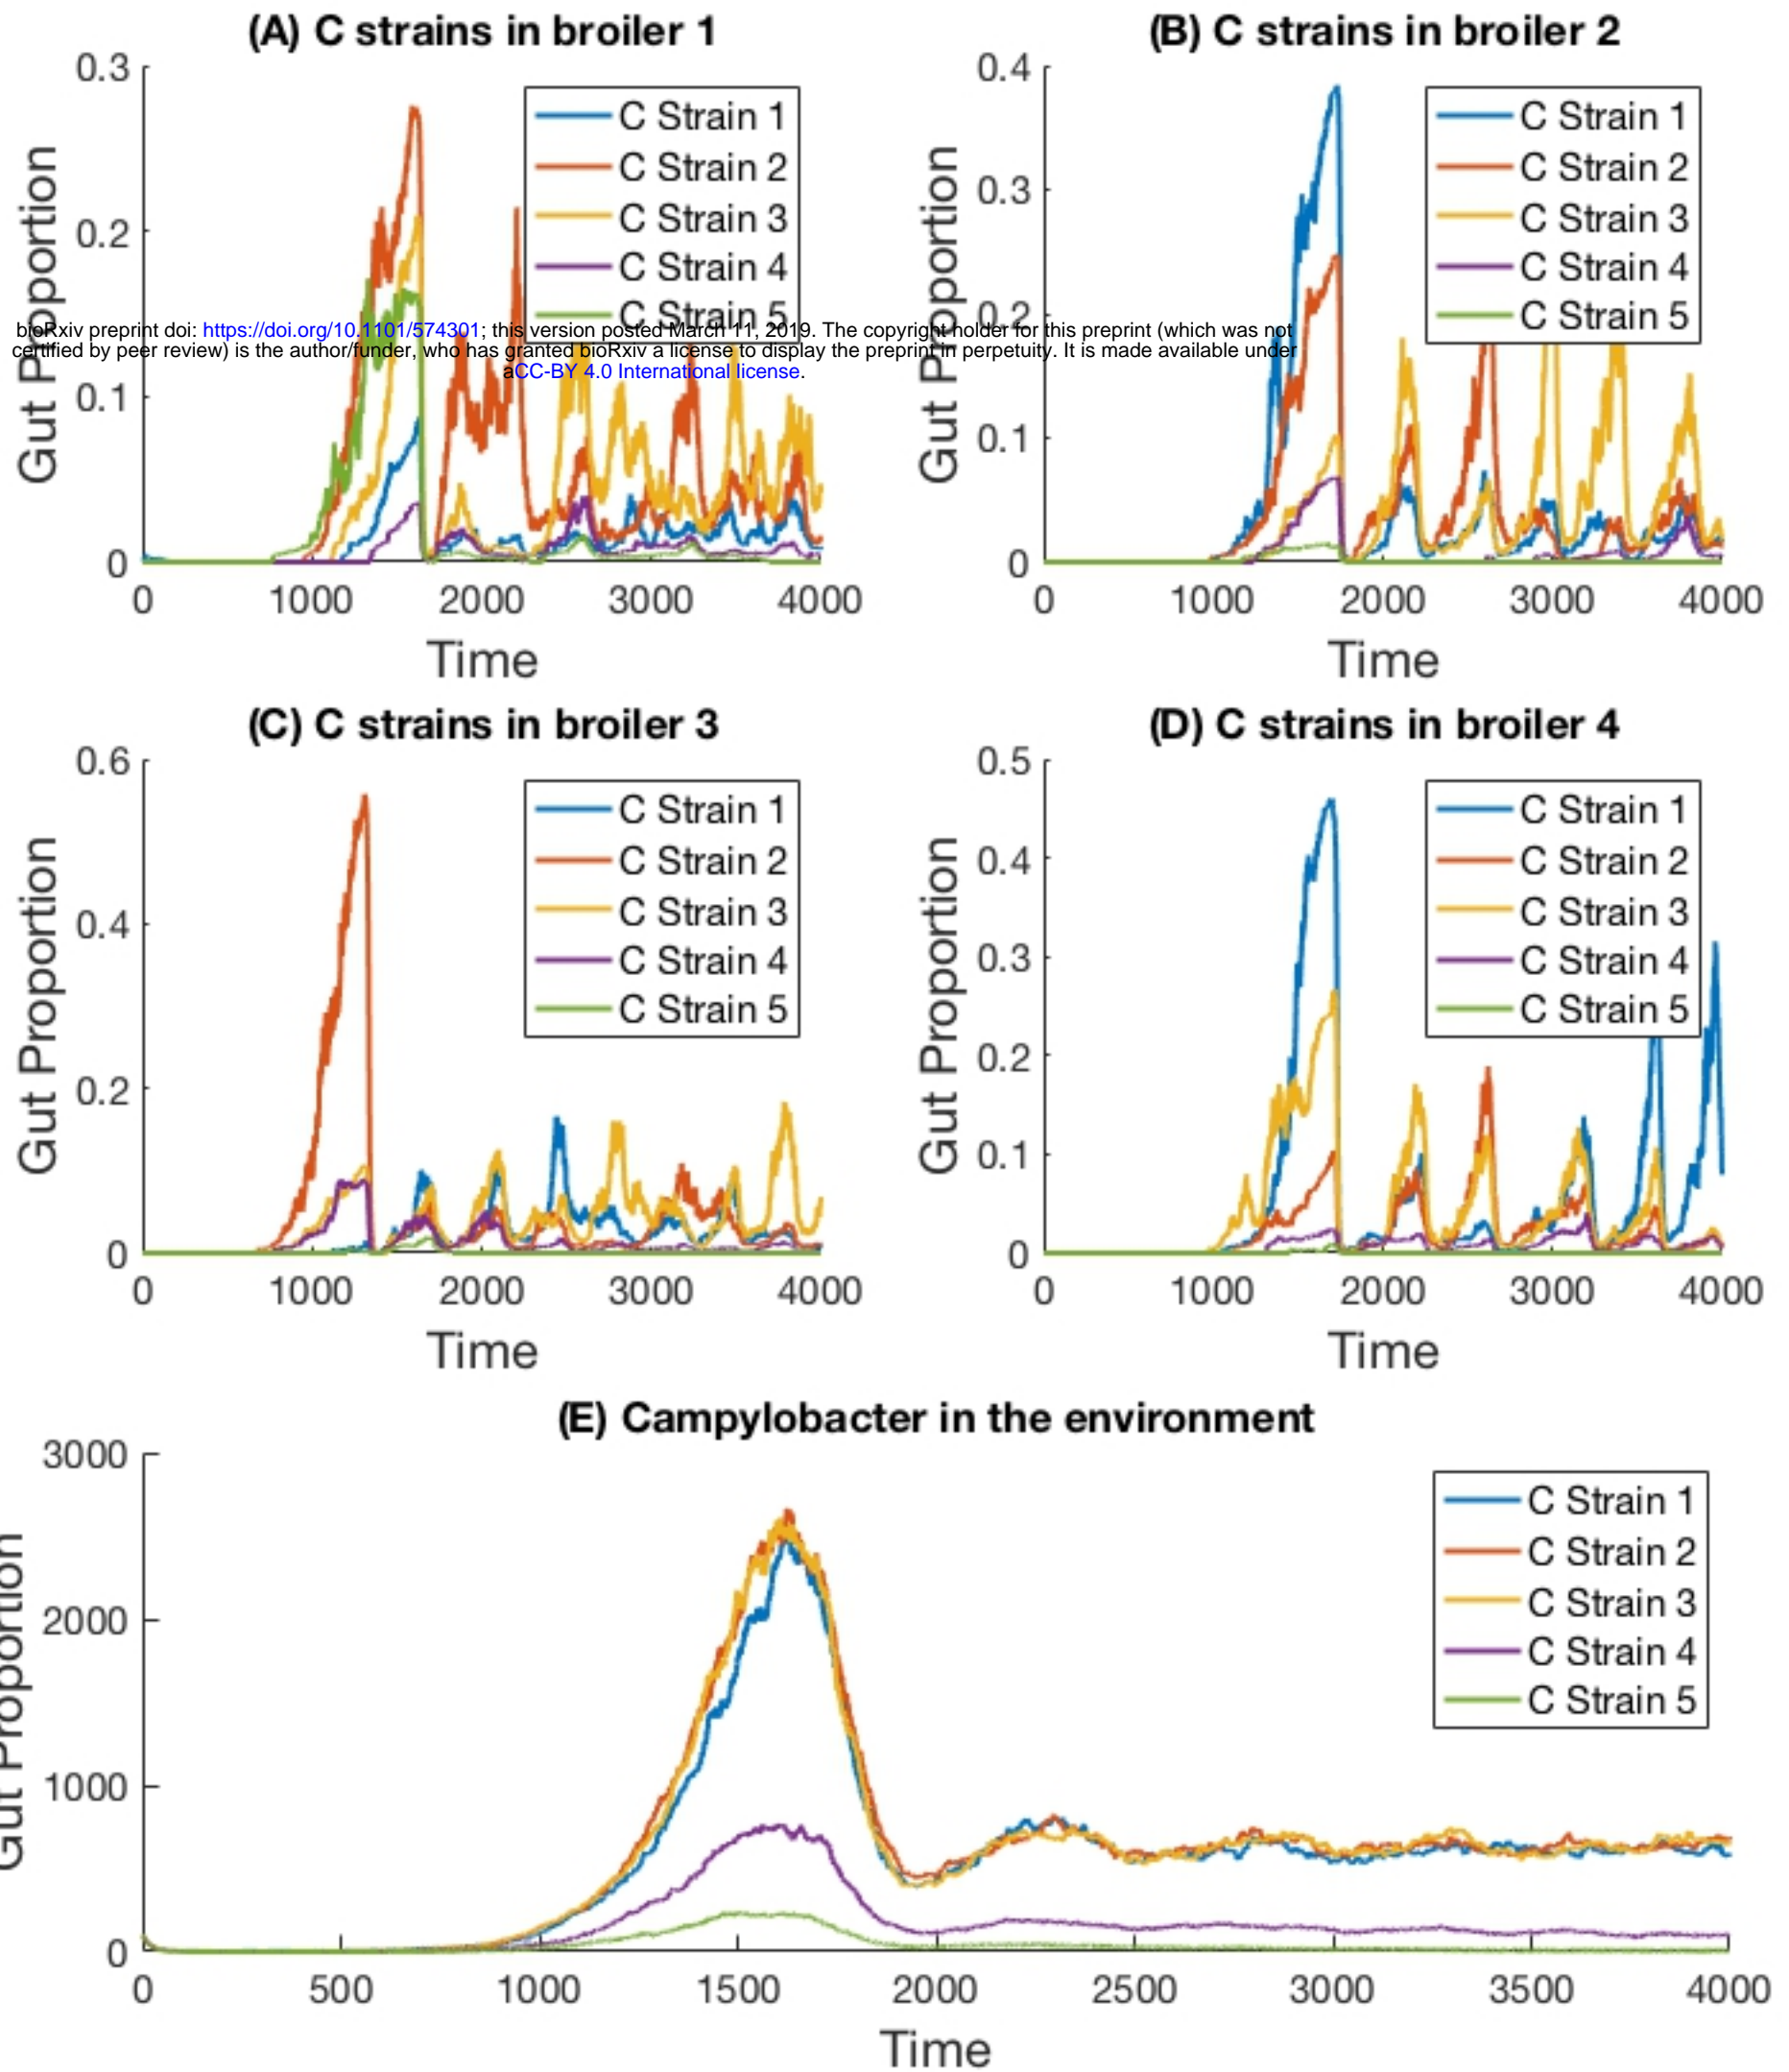

Figure 10

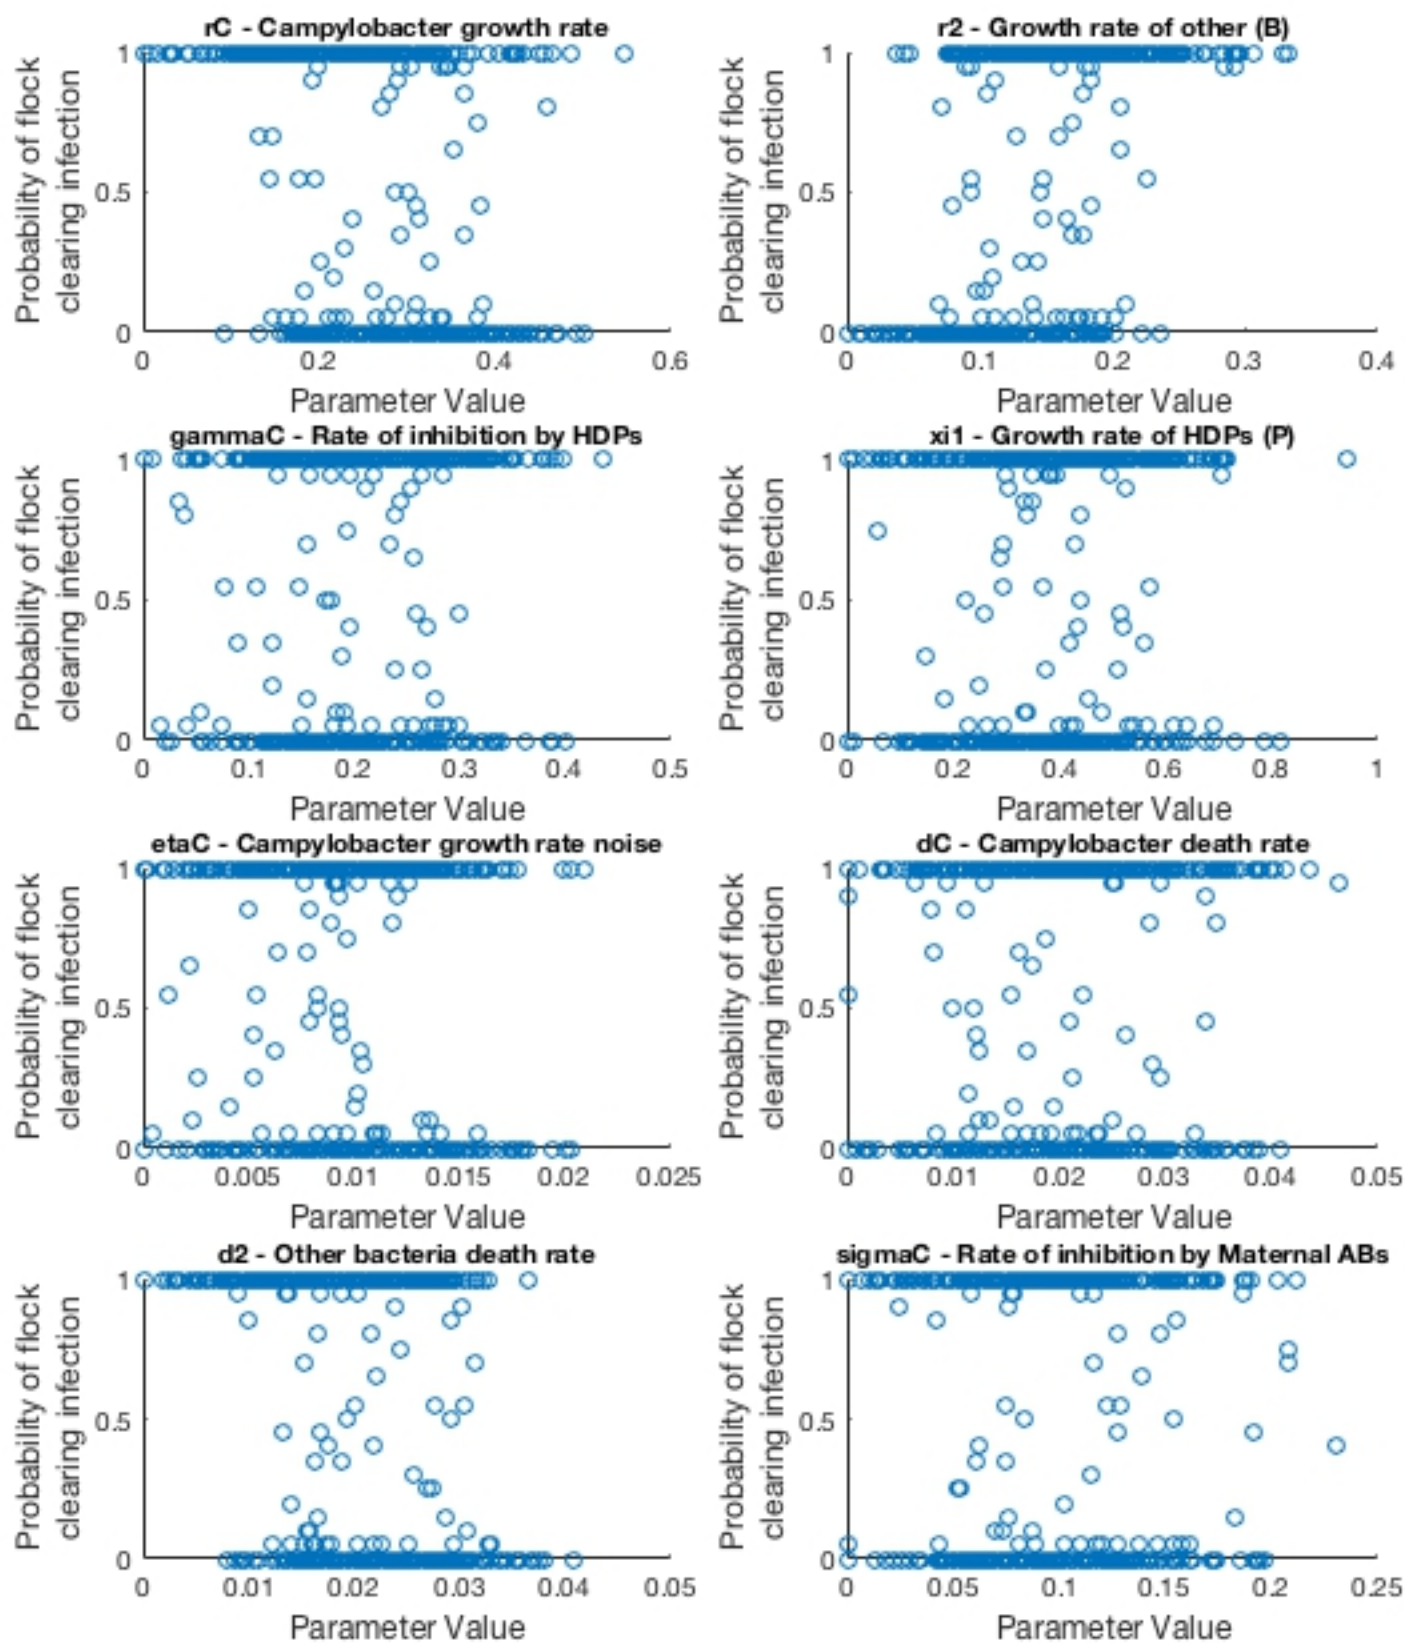

Figure 11
